# Supplementary material for: New Evidence on the Linkage of Population Trends and Species Traits to Long-Term Niche Changes
Source: MDPI journal article supplement (doi:10.3390/birds3010011), 2022-03-16

Article

# New evidence on the linkage of population trends and species traits to long-term niche changes

Pietro Tirozzi<sup>1</sup>, Valerio Orioli<sup>1,\*</sup>, Olivia Dondina<sup>1</sup> and Luciano Bani<sup>1,2</sup>

<sup>1</sup> Department of Earth and Environmental Sciences, University of Milano-Bicocca, Piazza della Scienza 1, 20126 Milano, Italy; p.tirozzi@campus.unimib.it (P.T.); olivia.dondina@unimib.it (O.D.); luciano.bani@unimib.it (L.B.)

<sup>2</sup> World Biodiversity Association Onlus c/o NAT LAB Forte Inglese, Portoferraio, 57037 Livorno, Italy

\* Correspondence: valerio.orioli@unimib.it (V.O.)

## **SUPPLEMENTARY MATERIALS**

### **List of contents**

**Table S1. Land-cover variables used in PCA (E-space).**

**Table S2. List of species traits and referencing literature.**

**Table S3. Coordinates of each variable respect to the PCA-axes (E-space).**

**Figure S1. Contribution of each variable (%) to PC1 (a) and PC2 (b) (E-space).**

**Table S4. Niche breadth and centroid for each species along the PCA-axes (E-space) in T<sub>1</sub> and T<sub>2</sub>.**

**Figure S2. Notched box plots of niche breadth and centroid for each PCA-axis (E-space) in T<sub>1</sub> and T<sub>2</sub>.**

**Figure S3. Niche quantification in the E-space for each species in T<sub>1</sub> (1992-95-96) and T<sub>2</sub> (2015-16-17) and niche changes between the two periods.**

**Table S5. Schoener's D, expansion and unfilling index for each species.**

**Table S6. Coordinates of the 18 continuous species traits and of the niche metrics respect to the four retained PCA-axes (trait space).**

**Figure S4. Biplots between niche metrics and PCA-axes (trait space). (a) Dim1-Dim4. (b) Dim3-Dim4.**

**Table S1. Land-cover variables used in PCA (E-space).** “DUSAF code” and “description” represent the classification according to the 3rd level of DUSAF digital map [59], while “Variable code” and “name” indicate the corresponding land covers used in the analysis after merging of some variables.

| Land-cover variables |                                                                            |               |                                            |
|----------------------|----------------------------------------------------------------------------|---------------|--------------------------------------------|
| DUSAF code           | DUSAF description                                                          | Variable code | Variable name                              |
| 111                  | Continuous urban matrix (e.g., dense residential areas)                    | C110          | Continuous urban matrix                    |
| 121                  | Industrial areas and large production plants                               |               |                                            |
| 122                  | Road and rail networks                                                     |               |                                            |
| 123                  | Harbours                                                                   |               |                                            |
| 124                  | Airports                                                                   |               |                                            |
| 131                  | Quarries                                                                   |               |                                            |
| 132                  | Dumps                                                                      |               |                                            |
| 133                  | Building sites                                                             |               |                                            |
| 134                  | Degraded areas                                                             |               |                                            |
| 141                  | Green urban areas                                                          |               |                                            |
| 142                  | Recreational areas                                                         |               |                                            |
| 112                  | Discontinuous urban matrix (e.g., farmsteads, scattered residential areas) | C112          | Discontinuous urban matrix                 |
| 211                  | Arable lands (e.g., maize, wheat, horticulture)                            | C211          | Arable lands                               |
| 213                  | Paddy fields                                                               | C213          | Paddy fields                               |
| 221                  | Vineyards                                                                  | C220          | Permanent orchard plantations              |
| 222                  | Orchards                                                                   |               |                                            |
| 223                  | Olive groves                                                               |               |                                            |
| 224                  | Wood plantations                                                           | C224          | Wood plantations                           |
| 231                  | Meadows and pastures                                                       | C231          | Meadows and pastures                       |
| 311                  | Broadleaved forests                                                        | C311          | Broadleaved forests                        |
| 312                  | Coniferous forests                                                         | C312          | Coniferous forests                         |
| 313                  | Mixed forests                                                              | C313          | Mixed forests                              |
| 321                  | Grasslands                                                                 | C321          | Grasslands                                 |
| 322                  | Shrublands                                                                 | C322          | Shrublands                                 |
| 324                  | Shrub and grass vegetation under evolution                                 | C324          | Shrub and grass vegetation under evolution |
| 331                  | Areas around waterbodies without vegetation                                | C330          | Areas with sparse or absent vegetation     |
| 332                  | Debris deposits and rocks                                                  |               |                                            |
| 333                  | Rock areas with sparse vegetation                                          |               |                                            |
| 334                  | Glaciers and perennial snow                                                |               |                                            |
| 411                  | Wetland vegetation                                                         | C410          | Wetland vegetation                         |
| 511                  | Rivers and streams                                                         | C511          | Rivers and streams                         |
| 512                  | Natural and artificial lakes                                               | C512          | Natural and artificial lakes               |

**Table S2. List of species traits and referencing literature.**

| Species traits                                                                   |                                                               | Abbreviation | References |
|----------------------------------------------------------------------------------|---------------------------------------------------------------|--------------|------------|
| <b>Continuous</b>                                                                |                                                               |              |            |
| Mean length of the body                                                          |                                                               | len          | [87]       |
| Mean length of the wing                                                          |                                                               | wing         | [87]       |
| Mean length of the tail                                                          |                                                               | tail         | [87]       |
| Mean length of the bill                                                          |                                                               | bil          | [87]       |
| Mean length of tarsus                                                            |                                                               | tar          | [87]       |
| Mean weight in breeding season                                                   |                                                               | wei          | [87]       |
| Mean clutch size                                                                 |                                                               | clu          | [87]       |
| Mean number of broods per breeding season                                        |                                                               | bro          | [53,87]    |
| Annual fecundity (clu x bro)                                                     |                                                               | fec          | [88]       |
| Incubation period                                                                |                                                               | inc          | [87]       |
| Fledging period                                                                  |                                                               | fle          | [87]       |
| Dispersal ratio (len/cube root[wei])                                             |                                                               | disr         | [89,90]    |
| Specialization index for the foraging habitat                                    |                                                               | SSI.fh       | [53,91,92] |
| Specialization index for the acquisition behavior                                |                                                               | SSI.acq      | [53,91,92] |
| Specialization index for the nesting habitat                                     |                                                               | SSI.nes      | [53,91,92] |
| Specialization index for the foraging substrate                                  |                                                               | SSI.fs       | [53,91,92] |
| Specialization index for the diet                                                |                                                               | SSI.tr       | [53,91,92] |
| Overall specialization index<br>(mean[SSI.fh, SSI.acq, SSI.nes, SSI.fs, SSI.tr]) |                                                               | SSI.ov       | [53]       |
| <b>Categorical</b>                                                               |                                                               |              |            |
| Migration strategy                                                               |                                                               | -            | [53]       |
| Groups                                                                           | Long-distance migrants<br>Short-distance migrant<br>Sedentary |              |            |
| Landscape type                                                                   |                                                               | -            | [53]       |
| Groups                                                                           | Farmland<br>Woodland<br>Natural-open habitat<br>Several       |              |            |
| Nest type                                                                        |                                                               | -            | [53,87]    |
| Group                                                                            | Elevated-nester<br>Ground-nester<br>Hole-nester               |              |            |
| Diet                                                                             |                                                               | -            | [53,93]    |
| Group                                                                            | Vertebrates<br>Plant-eaters<br>Invertebrates<br>Omnivores     |              |            |

**Table S3. Coordinates of each variable respect to the first two PCA-axes (E-space).** See Table S1 and Section 2.2 in the main text for variables' abbreviations.

| <b>Variable</b> | <b>PC1</b> | <b>PC2</b> |
|-----------------|------------|------------|
| C110            | 0.23       | 0.05       |
| C112            | 0.17       | 0.11       |
| C211            | 0.56       | −0.41      |
| C213            | 0.15       | −0.20      |
| C220            | 0.10       | 0.04       |
| C224            | 0.16       | −0.21      |
| C231            | 0.02       | 0.35       |
| C311            | −0.04      | 0.56       |
| C312            | −0.47      | −0.12      |
| C313            | −0.26      | 0.36       |
| C321            | −0.50      | −0.35      |
| C322            | −0.45      | −0.41      |
| C324            | −0.15      | 0.06       |
| C330            | −0.46      | −0.39      |
| C410            | 0.06       | −0.03      |
| C511            | 0.11       | −0.17      |
| C512            | −0.06      | −0.03      |
| Elevation       | −0.95      | −0.10      |
| sin             | 0.05       | −0.17      |
| cos             | −0.13      | 0.08       |
| Slope           | −0.79      | 0.37       |
| rr              | −0.58      | 0.49       |
| tmax            | 0.95       | 0.10       |
| tavg            | 0.96       | 0.10       |
| tmin            | 0.94       | 0.13       |

**Figure S1. Contribution of each variable (%) to PC1 (a) and PC2 (b) (E-space).** The red-dashed line represents the expected average contribution. If the contribution of the variables were uniform, the expected value would be the reciprocal of the number of variables (4%).

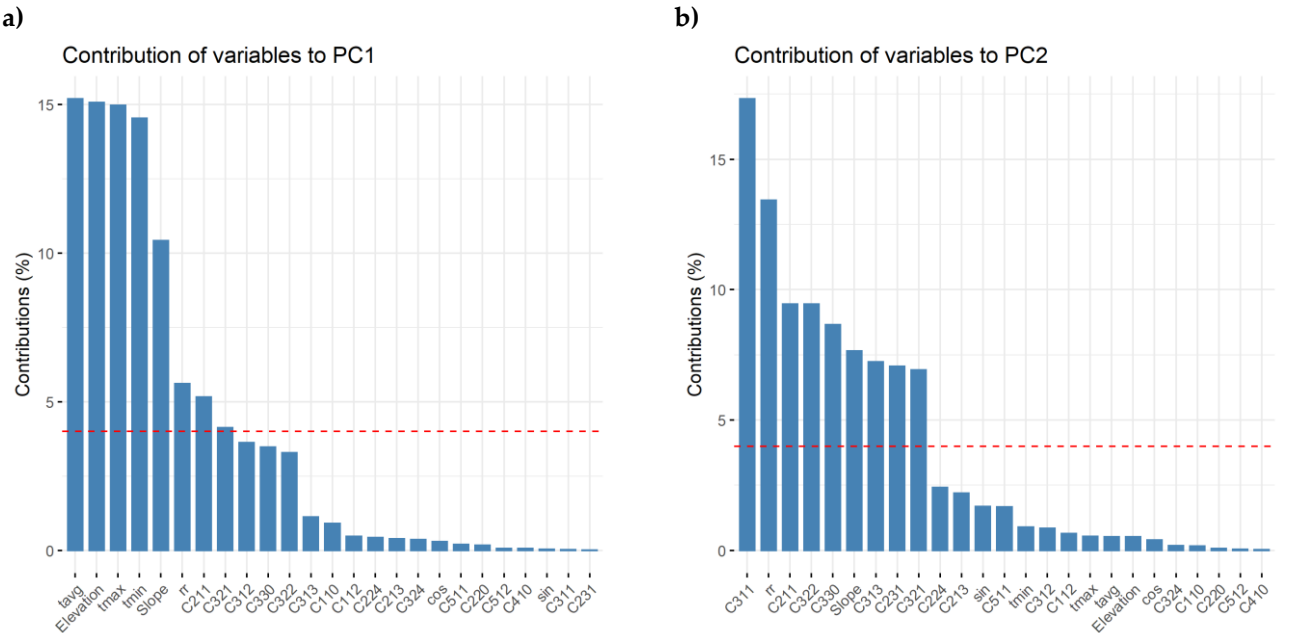

**Table S4. Niche breadth and centroid for each species along the PCA-axes (E-space) in T1 and T2.** T<sub>1</sub> = 1992–95–96; T<sub>2</sub> = 2015–16–17; PC1 = PCA-axis 1; PC2 = PCA-axis 2. Species are presented with the common name [97] and following the taxonomic order.

| Species                   | Breadth        |      |                |      | Centroid       |       |                |       |
|---------------------------|----------------|------|----------------|------|----------------|-------|----------------|-------|
|                           | T <sub>1</sub> |      | T <sub>2</sub> |      | T <sub>1</sub> |       | T <sub>2</sub> |       |
|                           | PC1            | PC2  | PC1            | PC2  | PC1            | PC2   | PC1            | PC2   |
| Black-crowned Night Heron | 0.18           | 0.40 | 0.06           | 0.33 | 1.59           | −1.17 | 1.92           | −0.94 |
| Little Egret              | 0.09           | 0.33 | 0.12           | 0.38 | 1.53           | −1.27 | 2.09           | −1.03 |
| Grey Heron                | 0.13           | 0.48 | 0.42           | 0.56 | 1.63           | −1.06 | 2.03           | −0.76 |
| Mallard                   | 1.26           | 1.69 | 0.41           | 0.68 | 1.35           | −0.56 | 2.03           | −0.85 |
| Black Kite                | 1.49           | 1.12 | 1.47           | 1.36 | 0.15           | 0.70  | 0.50           | 1.18  |
| Common Buzzard            | 2.05           | 1.20 | 2.39           | 1.44 | −0.70          | 1.71  | 1.38           | 0.46  |
| Common Kestrel            | 5.86           | 2.16 | 2.64           | 0.85 | 0.46           | 0.31  | 2.09           | −0.67 |
| Common Quail              | 0.42           | 0.57 | 0.16           | 0.59 | 1.63           | −0.21 | 2.22           | −0.91 |
| Common Pheasant           | 0.58           | 1.26 | 0.39           | 0.75 | 1.56           | −0.29 | 2.08           | −0.73 |
| Common Moohren            | 0.31           | 0.79 | 0.19           | 0.44 | 1.60           | −0.66 | 2.02           | −0.73 |
| Feral Pigeon              | 0.38           | 0.75 | 0.36           | 0.63 | 1.62           | −0.22 | 1.99           | −0.20 |
| Common Wood Pigeon        | 0.68           | 1.28 | 0.92           | 1.04 | 1.39           | 0.06  | 1.91           | −0.22 |
| Eurasian Collared Dove    | 0.50           | 0.90 | 0.57           | 0.77 | 1.55           | −0.26 | 1.99           | −0.24 |
| European Turtle Dove      | 0.82           | 1.04 | 0.47           | 0.82 | 1.43           | −0.03 | 1.89           | −0.43 |
| Common Cuckoo             | 4.19           | 1.72 | 4.76           | 1.89 | 1.03           | −0.07 | −0.65          | 0.83  |
| Common Swift              | 2.39           | 1.27 | 3.10           | 1.22 | 1.45           | −0.16 | 1.85           | −0.04 |
| Eurasian Wryneck          | 2.08           | 1.12 | 1.26           | 0.81 | 1.35           | 0.11  | 1.36           | 0.49  |
| European Green Woodpecker | 1.87           | 0.78 | 3.22           | 1.44 | −0.61          | 1.26  | 0.83           | 0.38  |
| Great Spotted Woodpecker  | 2.09           | 2.44 | 3.82           | 1.49 | 0.49           | 0.90  | 1.20           | 0.43  |
| Eurasian Skylark          | 0.69           | 0.47 | 9.40           | 0.84 | 1.77           | −0.70 | 2.03           | −0.98 |
| Eurasian Crag Martin      | 3.76           | 2.60 | 4.17           | 2.05 | −1.74          | 1.55  | −1.50          | 0.47  |
| Barn Swallow              | 1.43           | 1.19 | 0.63           | 0.70 | 1.54           | −0.07 | 2.02           | −0.26 |
| Common House Martin       | 2.05           | 1.27 | 4.61           | 1.24 | 1.13           | 0.33  | 1.48           | 0.07  |
| Tree Pipit                | 2.74           | 1.86 | 1.74           | 2.31 | −3.77          | 0.01  | −3.55          | −0.31 |
| Water Pipit               | 0.44           | 0.78 | 1.40           | 1.09 | −5.63          | −2.52 | −4.86          | −2.50 |
| Western Yellow Wagtail    | 0.17           | 0.44 | 0.06           | 0.34 | 1.79           | −0.72 | 2.26           | −1.03 |
| Grey Wagtail              | 7.49           | 1.96 | 4.72           | 2.25 | −2.75          | 0.23  | −2.22          | 0.25  |
| White Wagtail             | 5.20           | 1.57 | 6.43           | 1.73 | −0.02          | 0.59  | −0.91          | 0.31  |
| Eurasian Wren             | 6.29           | 2.35 | 3.76           | 2.41 | −1.59          | 1.07  | −1.97          | 1.07  |
| Duncock                   | 0.44           | 0.80 | 1.82           | 2.91 | −5.49          | −1.07 | −4.54          | −1.28 |
| European Robin            | 3.90           | 1.32 | 3.57           | 2.22 | −1.90          | 1.52  | −1.97          | 1.26  |
| Common Nigthingale        | 0.68           | 1.05 | 0.37           | 0.70 | 1.60           | −0.38 | 2.06           | −0.62 |
| Black Redstart            | 6.09           | 3.11 | 7.03           | 2.72 | −5.66          | −2.02 | −3.89          | −0.36 |

**Table S4** (cont.)

|                           |      |      |      |      |       |       |       |       |
|---------------------------|------|------|------|------|-------|-------|-------|-------|
| Common Redstart           | 3.45 | 1.10 | 4.11 | 1.21 | -1.02 | 1.47  | -0.66 | 0.72  |
| African Stonechat         | 0.86 | 0.72 | 1.17 | 0.72 | 1.73  | -0.44 | 1.92  | 0.02  |
| Northern Wheatear         | 1.92 | 2.13 | 1.09 | 1.22 | -5.49 | -2.52 | -4.73 | -2.14 |
| Common Blackbird          | 3.68 | 1.39 | 5.31 | 1.47 | 1.34  | -0.01 | 1.76  | -0.16 |
| Song Thrush               | 3.59 | 1.19 | 3.06 | 3.23 | -3.95 | -0.02 | -2.30 | 0.91  |
| Mistle Thrush             | 4.30 | 3.27 | 2.27 | 3.44 | -3.08 | 0.38  | -4.22 | -0.58 |
| Cetti's Warbler           | 0.33 | 0.67 | 0.23 | 0.51 | 1.71  | -0.53 | 1.87  | -0.53 |
| Melodius Warbler          | 1.12 | 1.47 | 0.34 | 0.78 | 1.27  | 0.11  | 1.89  | -0.42 |
| Lesser Whitethroat        | 2.89 | 2.73 | 1.59 | 2.09 | -5.75 | -0.80 | -4.69 | -1.89 |
| Eurasian Blackcap         | 3.85 | 1.20 | 4.57 | 1.33 | 0.93  | 0.25  | 1.01  | 0.32  |
| Western Bonelli's Warbler | 3.21 | 1.14 | 2.26 | 1.77 | -1.47 | 1.76  | -1.46 | 1.60  |
| Common Chiffchaff         | 4.40 | 1.77 | 3.61 | 2.94 | -1.91 | 1.53  | -2.11 | 0.89  |
| Goldcrest                 | 2.83 | 1.77 | 2.12 | 1.57 | -3.11 | 0.58  | -2.88 | 0.57  |
| Common Firecrest          | 5.19 | 0.85 | 3.47 | 0.80 | -4.48 | -0.44 | -1.71 | 0.89  |
| Spotted Flycatcher        | 2.13 | 1.28 | 2.63 | 1.08 | 0.86  | 0.83  | 0.54  | 0.78  |
| Long-tailed Tit           | 2.66 | 0.75 | 2.58 | 1.13 | -0.84 | 1.63  | 0.63  | 0.95  |
| Marsh Tit                 | 2.20 | 0.95 | 1.62 | 0.45 | -1.97 | 1.57  | -1.23 | 1.83  |
| Willow Tit                | 1.79 | 1.85 | 1.57 | 3.11 | -4.96 | -0.73 | -5.08 | -1.60 |
| European Crested Tit      | 3.47 | 2.05 | 3.19 | 3.55 | -3.30 | 0.26  | -3.34 | -0.22 |
| Coal Tit                  | 5.04 | 1.90 | 3.24 | 3.16 | -3.41 | 0.49  | -2.58 | 0.72  |
| Eurasian Blue Tit         | 2.58 | 0.88 | 1.93 | 0.90 | -0.77 | 1.48  | -0.39 | 1.34  |
| Great Tit                 | 2.90 | 1.41 | 2.97 | 1.26 | 0.44  | 0.59  | 1.36  | 0.25  |
| Eurasian Nuthatch         | 1.56 | 0.23 | 2.59 | 0.99 | -0.31 | 1.62  | -1.38 | 1.66  |
| Eurasian Golden Oriole    | 0.61 | 1.05 | 0.39 | 0.89 | 1.52  | -0.19 | 1.90  | -0.30 |
| Red-backed Shrike         | 2.46 | 1.43 | 2.42 | 0.76 | 0.59  | 0.44  | 0.83  | 0.51  |
| Eurasian Jay              | 4.37 | 1.34 | 3.53 | 1.53 | -1.24 | 1.17  | -0.84 | 1.36  |
| Eurasian Magpie           | 0.34 | 0.65 | 0.32 | 0.66 | 1.53  | -0.26 | 2.07  | -0.43 |
| Carrion Crow              | 5.44 | 2.81 | 3.77 | 2.70 | -1.89 | 1.42  | -4.42 | -0.47 |
| Hooded Crow               | 2.49 | 1.29 | 2.94 | 1.19 | 1.45  | -0.15 | 1.68  | 0.08  |
| Common Starling           | 0.71 | 0.95 | 0.34 | 0.64 | 1.60  | -0.26 | 2.01  | -0.34 |
| Italian Sparrow           | 1.30 | 1.20 | 1.33 | 0.81 | 1.55  | -0.16 | 1.97  | -0.19 |
| Eurasian Tree Sparrow     | 0.72 | 0.81 | 0.76 | 0.62 | 1.61  | -0.32 | 2.04  | -0.46 |
| Common Chaffinch          | 5.58 | 1.36 | 6.15 | 1.98 | -0.41 | 0.89  | -0.95 | 0.69  |
| European Serin            | 1.13 | 0.72 | 2.06 | 0.63 | 1.27  | 0.41  | 1.47  | 0.23  |
| European Greenfinch       | 1.05 | 1.06 | 1.25 | 0.60 | 1.45  | 0.02  | 1.86  | 0.09  |
| European Goldfinch        | 1.25 | 1.28 | 2.70 | 0.71 | 1.54  | -0.11 | 1.85  | 0.05  |
| Common Redpoll            | 0.74 | 1.51 | 1.22 | 1.67 | -6.18 | -2.16 | -5.13 | -2.11 |
| Eurasian Bullfinch        | 2.57 | 1.22 | 2.04 | 2.78 | -4.60 | -0.20 | -2.56 | 0.17  |



**Figure S2. Notched box plots of niche breadth and centroid for each PCA-axis (E-space) in T<sub>1</sub> and T<sub>2</sub>.** From T<sub>1</sub> to T<sub>2</sub>, the median of the niche breadth varied from 2.05 (range = 0.09-7.49) to 2.06 (range = 0.06-9.40) along PC1, and from 1.20 (range = 0.23-3.27) to 1.13 (range = 0.33-3.55) along PC2. From T<sub>1</sub> to T<sub>2</sub>, the median of the niche centroid varied from 0.49 (range = - 6.18-1.79) to 1.01 (range = - 5.13-2.26) along PC1, and from - 0.02 (range = - 2.52-1.76) to - 0.04 (range = - 2.50-1.83) along PC2. In each box plot, the sample dimension is equal to the total number of the species (n=71). Whiskers are 1.5 x IQR. Black dots represent outliers. T<sub>1</sub> = 1992–95–96; T<sub>2</sub> = 2015–16–17; PC1 = PCA-axis 1; PC2 = PCA-axis 2. Notches give a roughly 95% confidence interval for medians. Wilcoxon rank sum test detected differences only for centroids' comparison along PC1 (niche breadth PC1: W = 2550, p-value = 0.906; niche breadth PC2: W = 2625, p-value = 0.671; niche centroid PC1: W = 1991, p-value = 0.031; niche centroid PC2: W = 2727, p-value = 0.401).

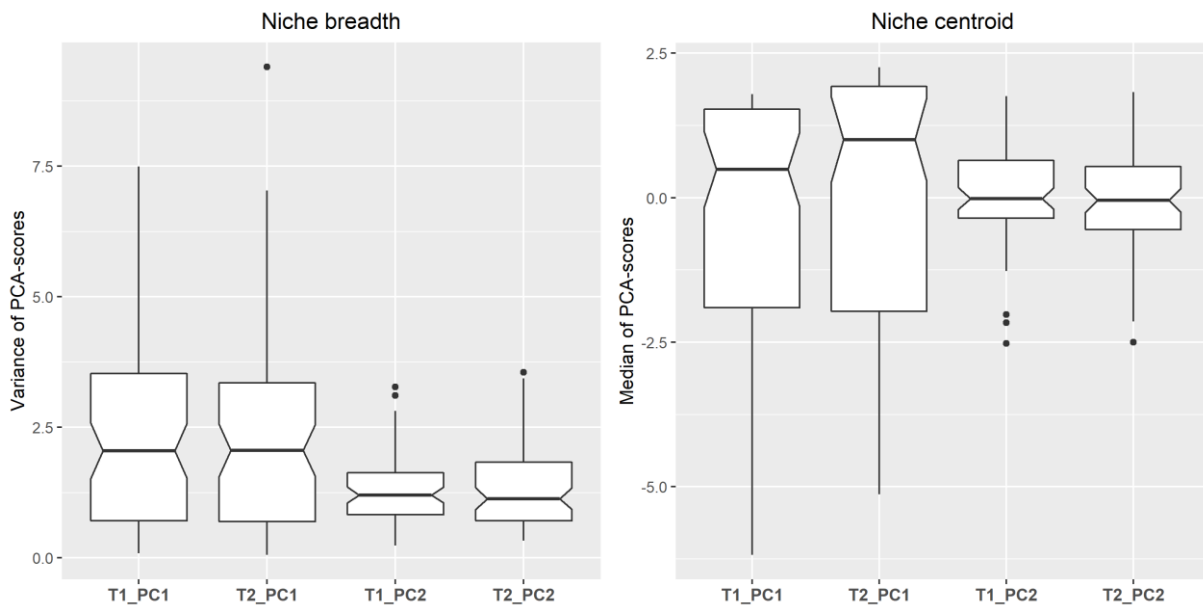

**Figure S3. Niche quantification in the E-space for each species in T<sub>1</sub> (1992-95-96) and T<sub>2</sub> (2015-16-17) and niche changes between the two periods.** The first plot represent the coordinates of the variables in the E-space to ease the interpretation of the niche respect to the PCA-axes. Niche in T<sub>1</sub> is shown in the left column, in T<sub>2</sub> in the middle column, and the overlap in the right column. In each row is represented a single species with its common and scientific name [97]. In the graphs of niche in T<sub>1</sub> and T<sub>2</sub> separately, the density of occurrence of species is depicted through a colored gradient from light grey (0) to green (1). In the graphs representing niche changes between T<sub>1</sub> and T<sub>2</sub>, the red area indicates the E-space exclusively occupied in T<sub>2</sub>, the green area the E-space exclusively occupied in T<sub>1</sub>, and the blue area the E-space occupied in both T<sub>1</sub> and T<sub>2</sub>. Color intensity of the filled area represents the density of occurrence of species in T<sub>2</sub>. The green and red solid lines represent the whole extent of the available E-space in T<sub>1</sub> and T<sub>2</sub>, respectively. Arrows indicate the centroids' shift from T<sub>1</sub> to T<sub>2</sub> for the available E-space (dashed arrow) and for the occupied E-space (solid arrow).

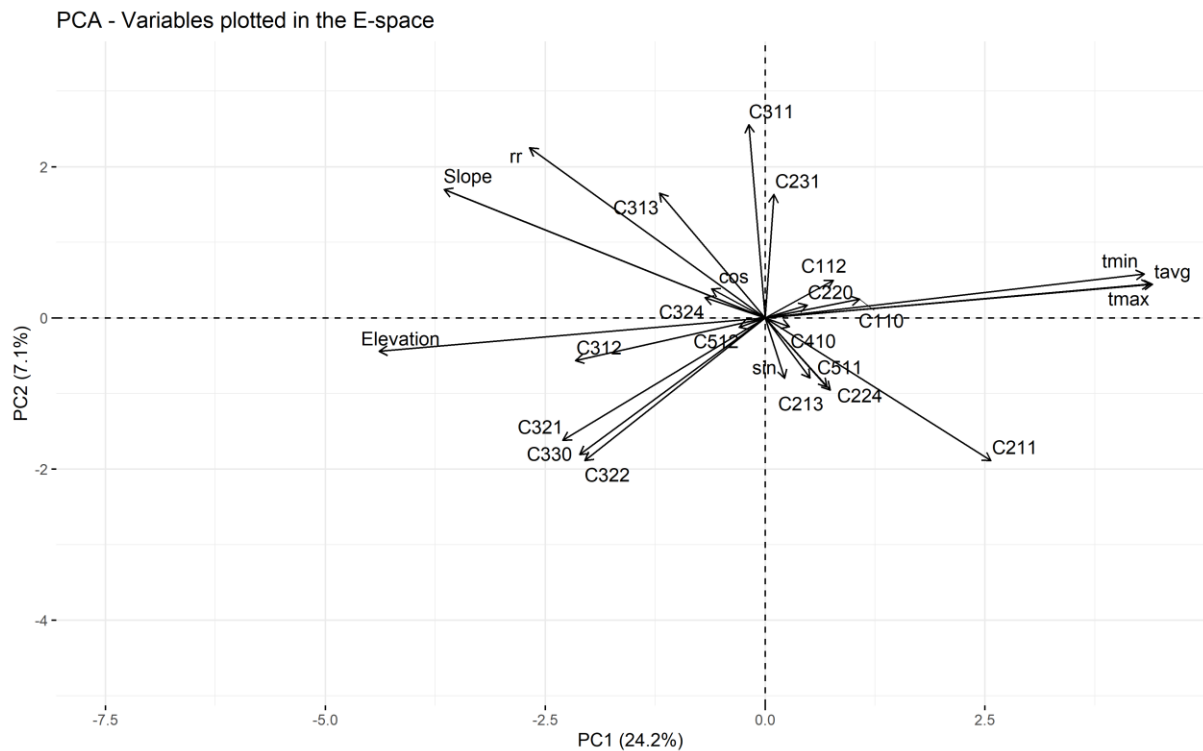

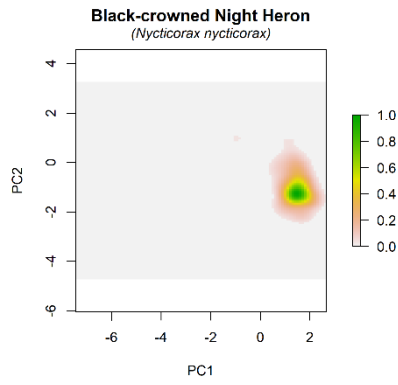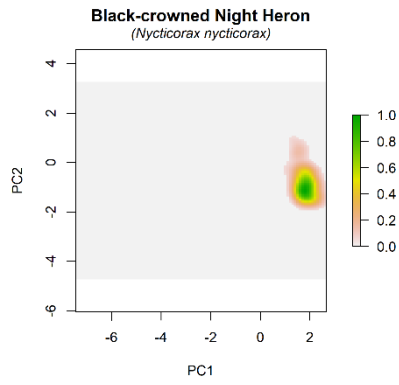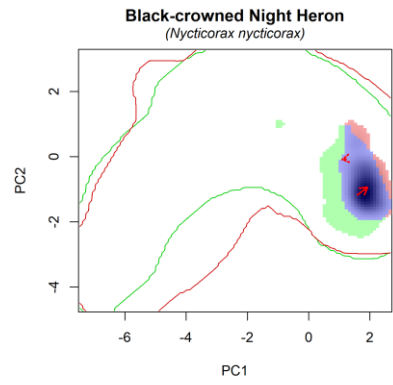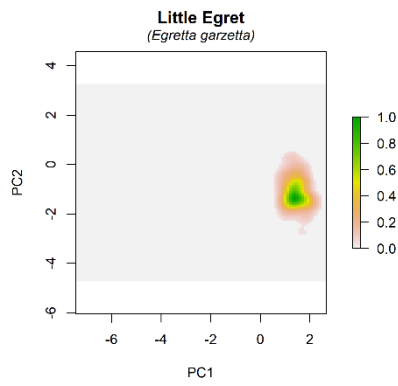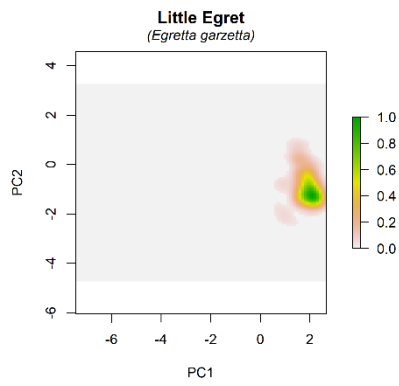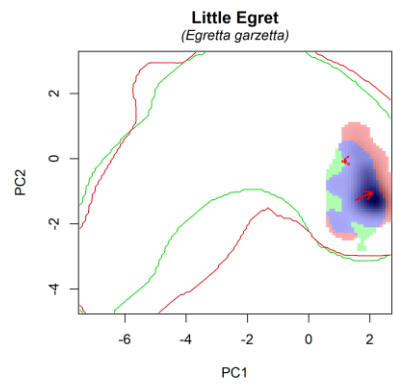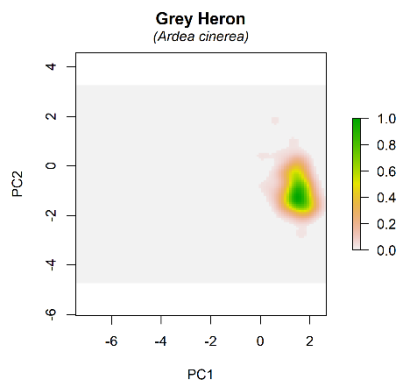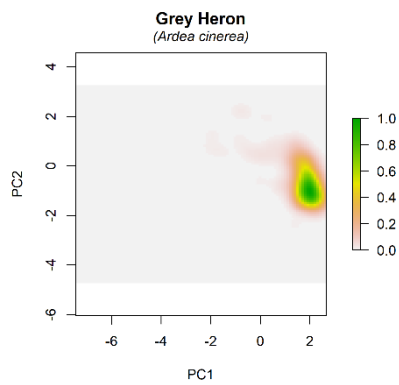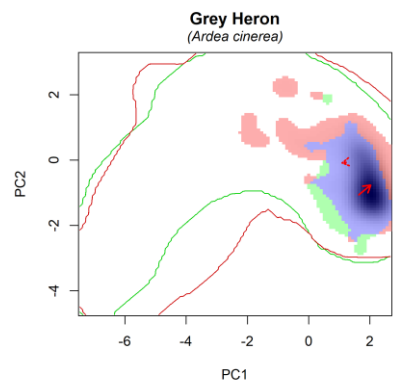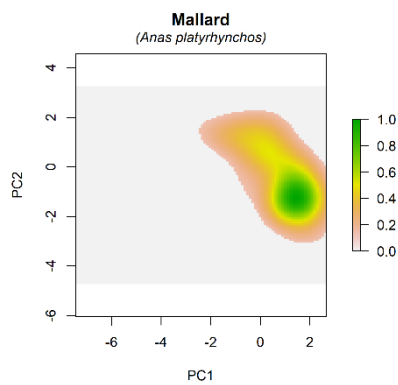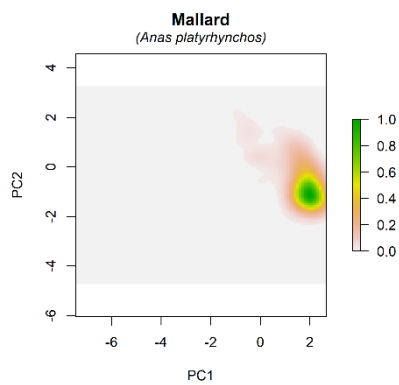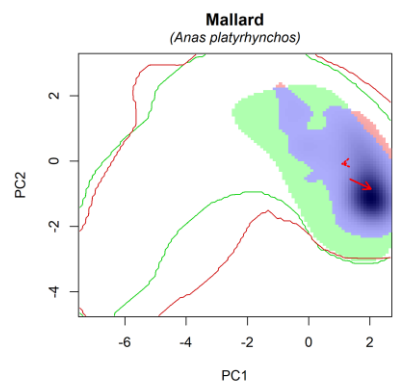

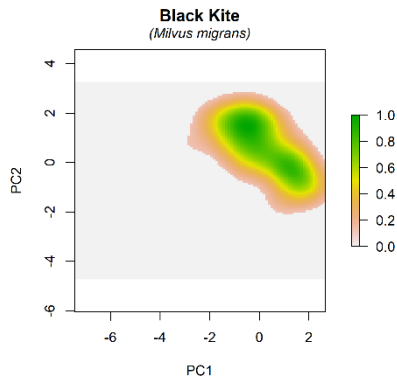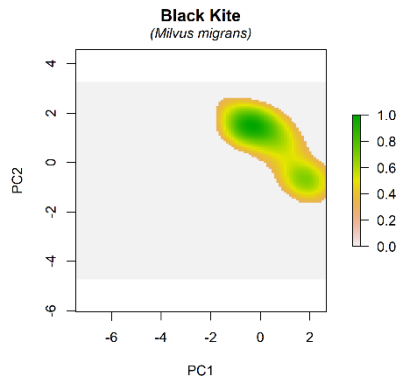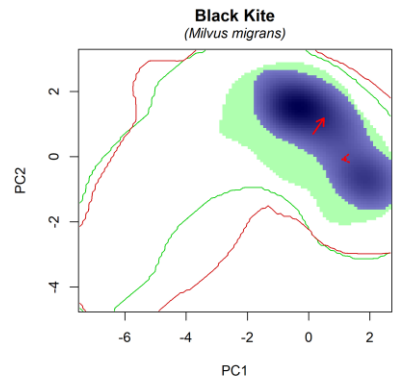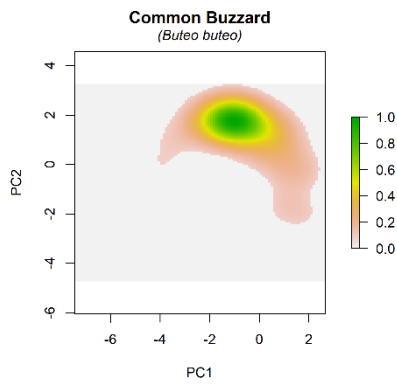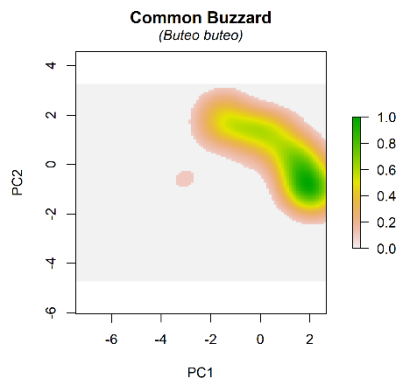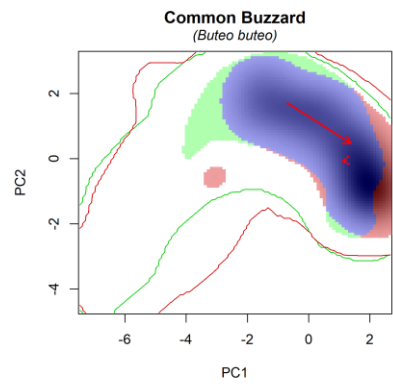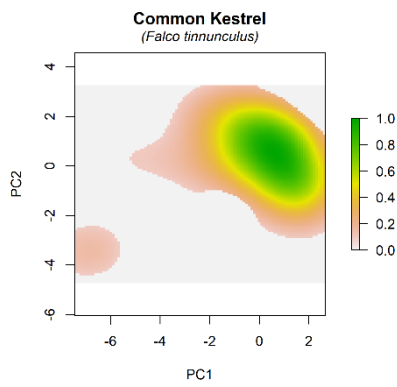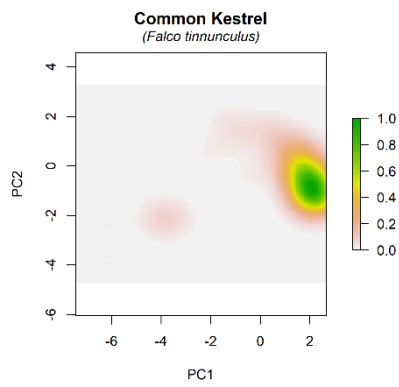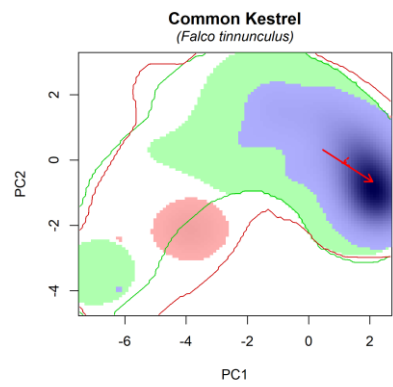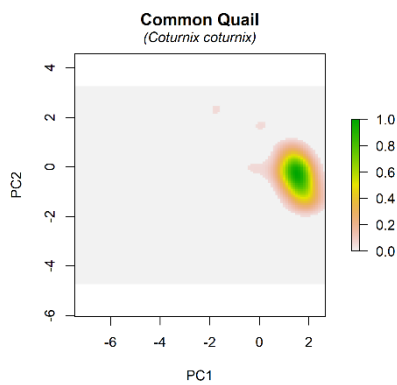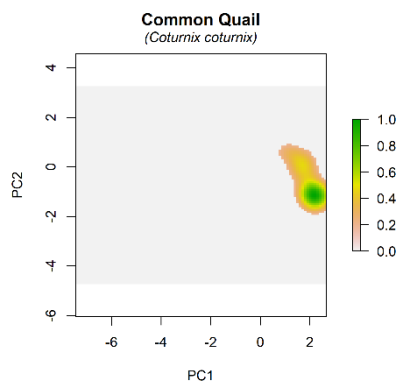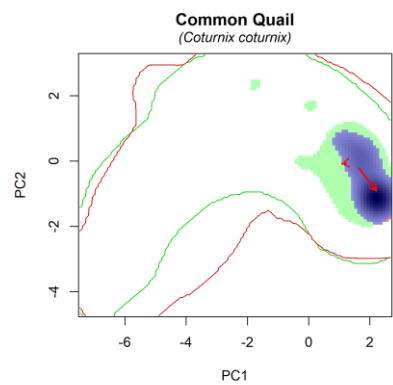

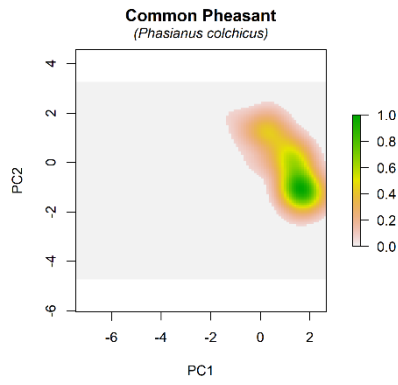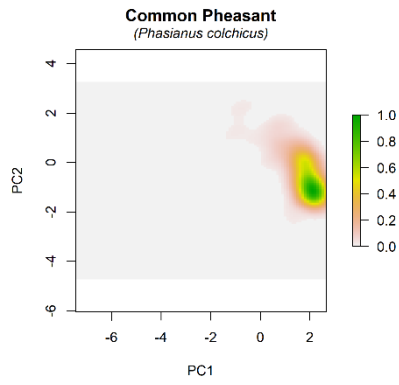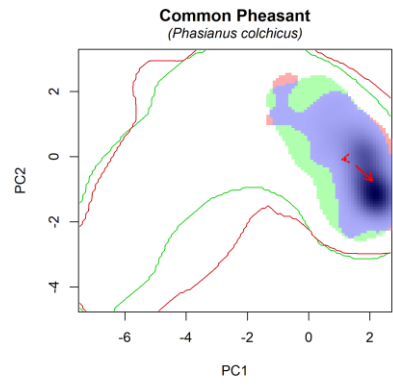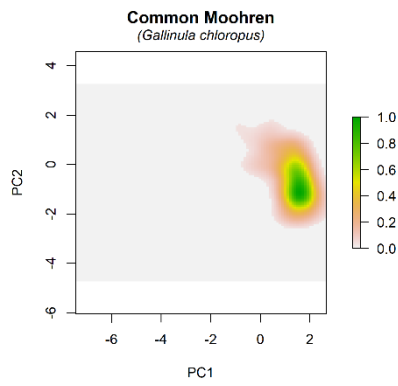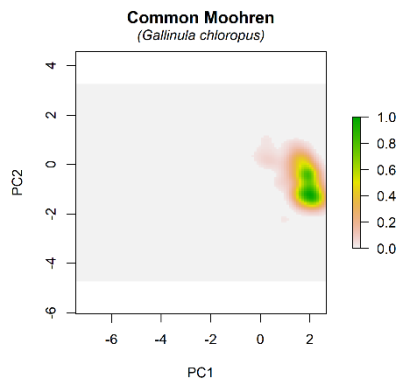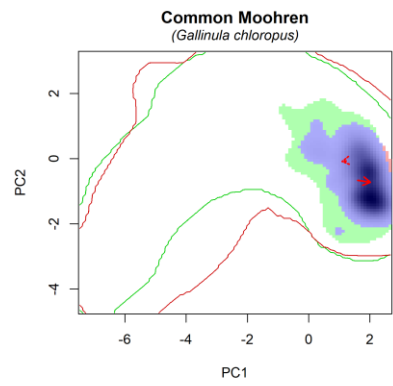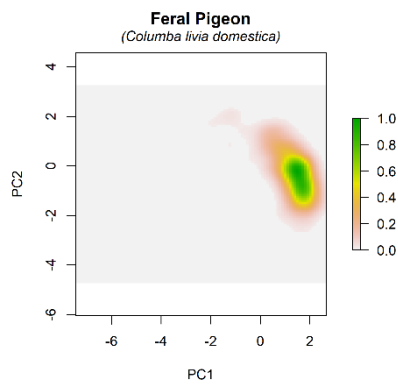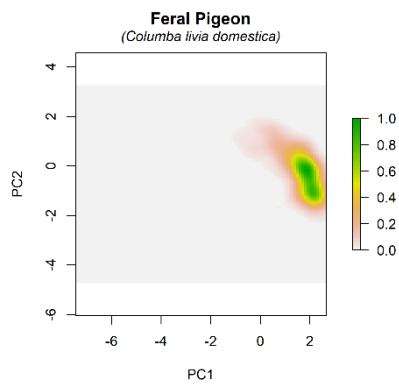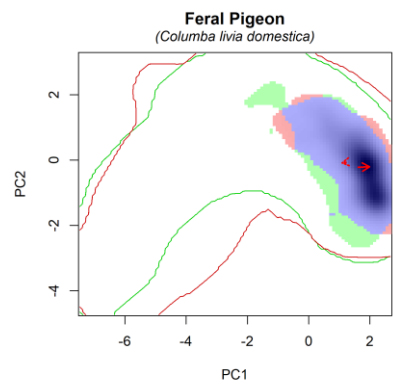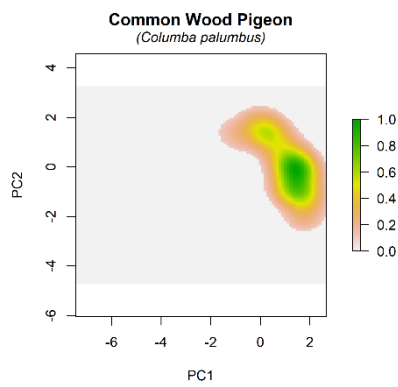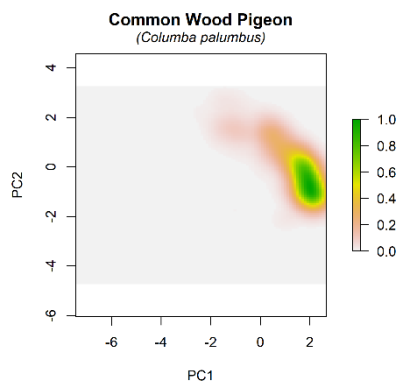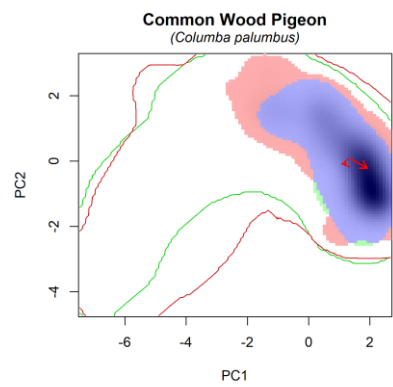

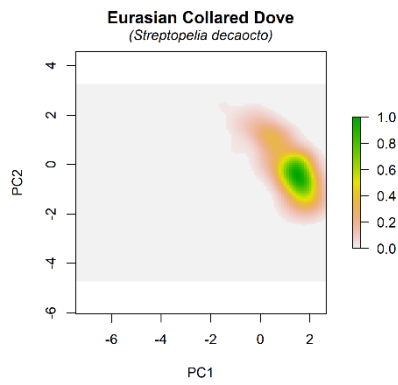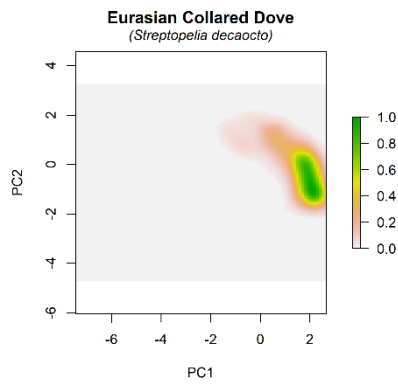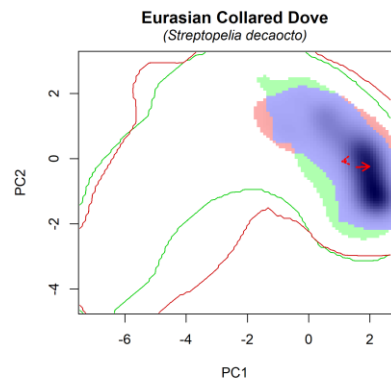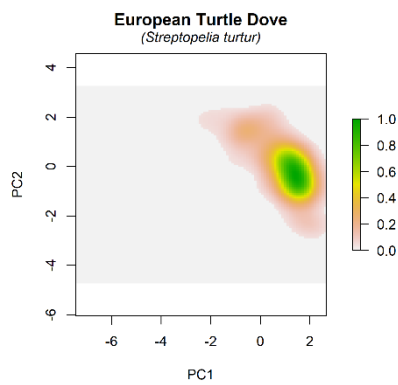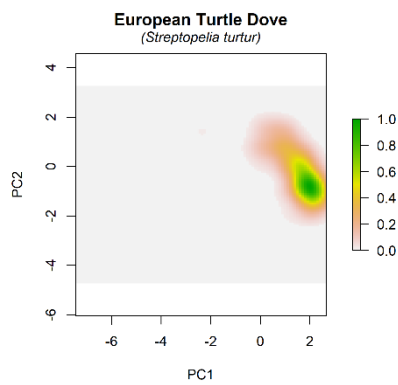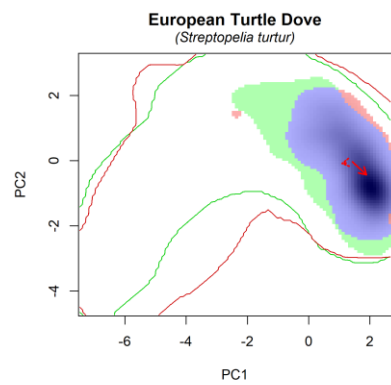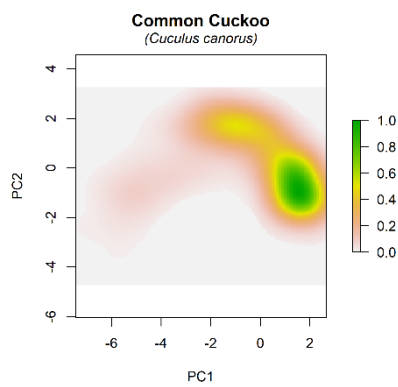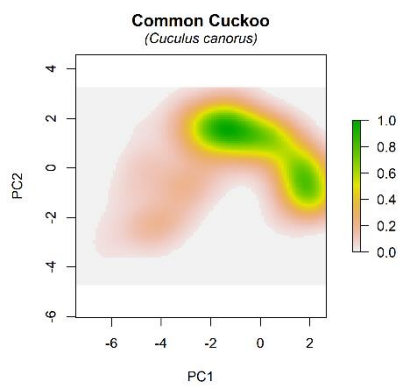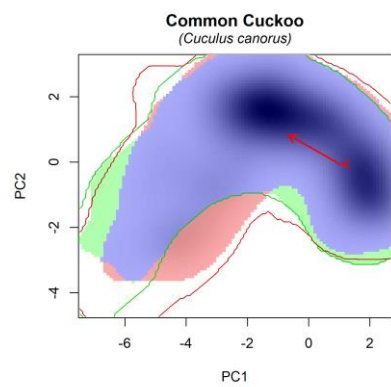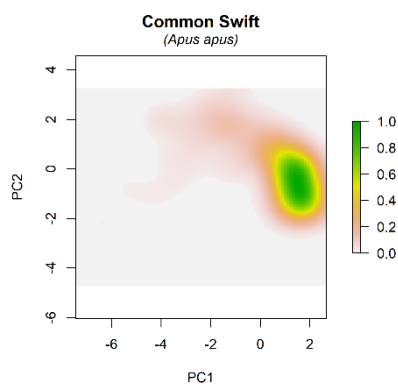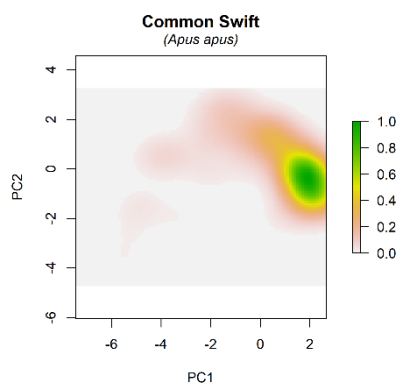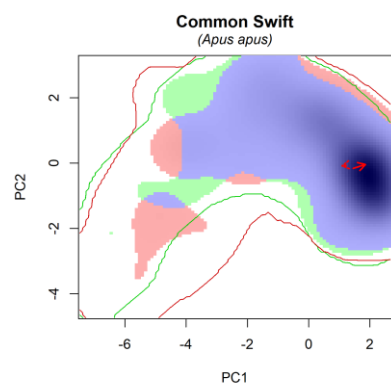

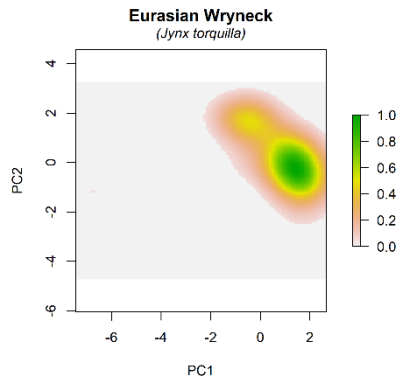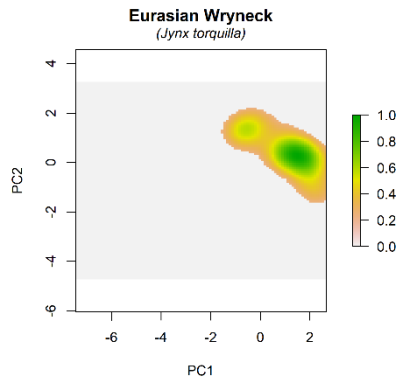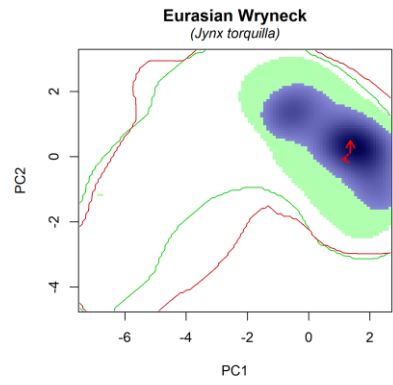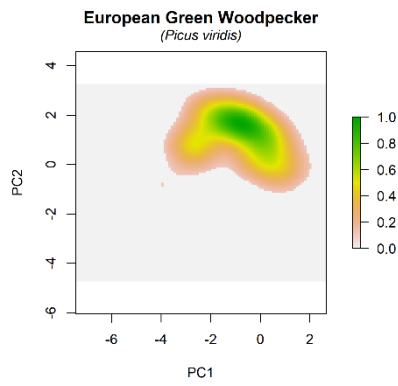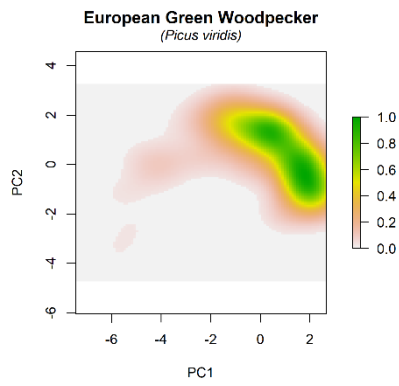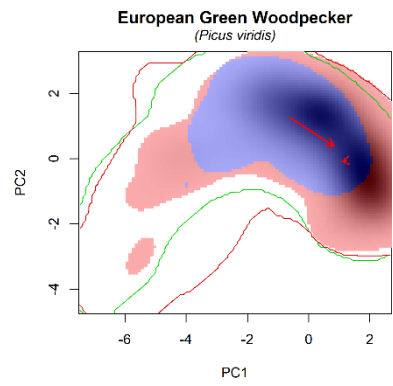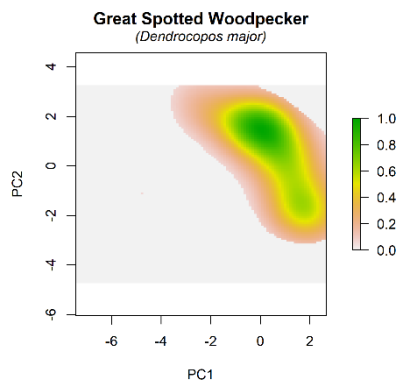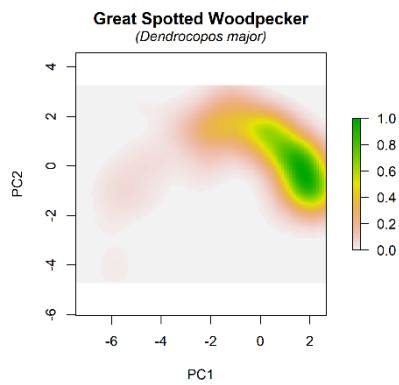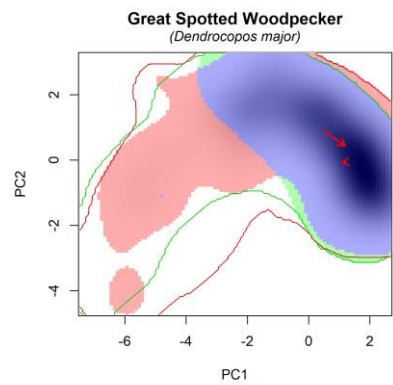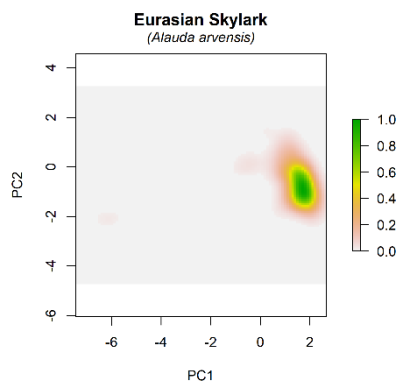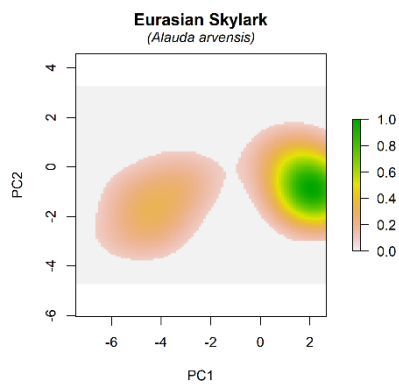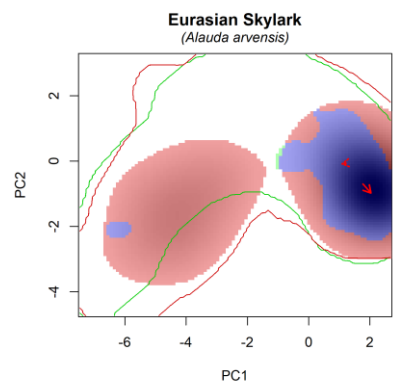

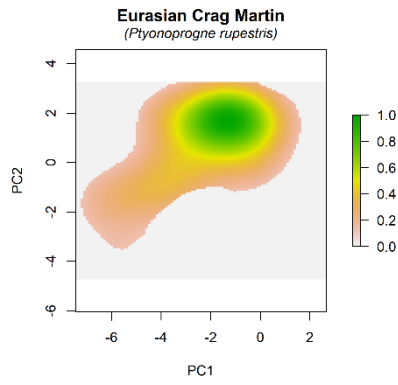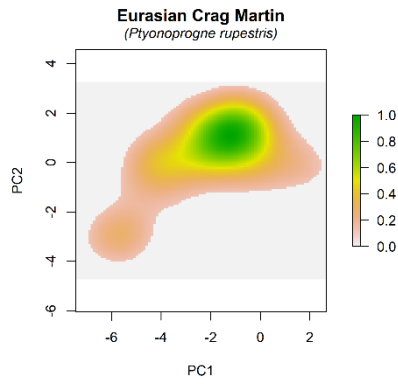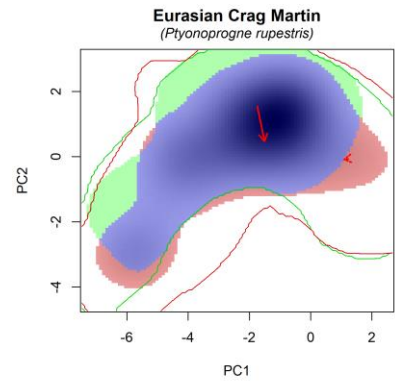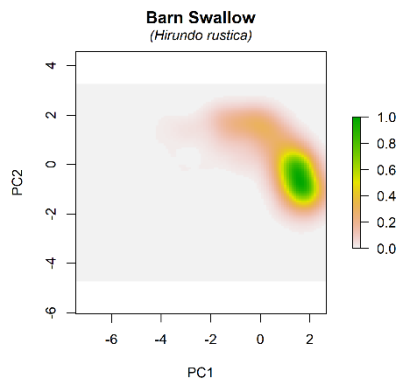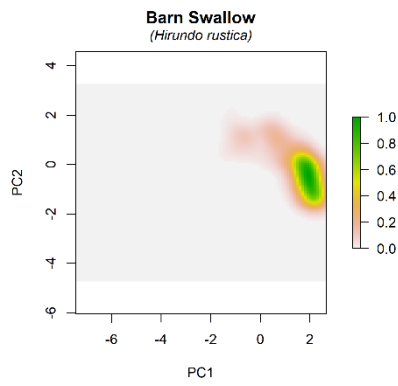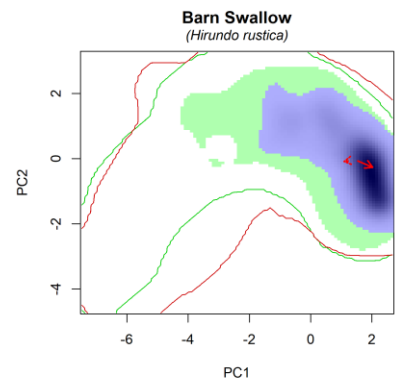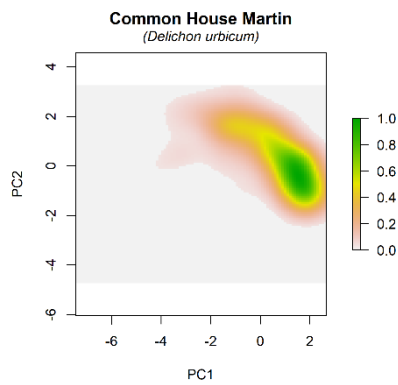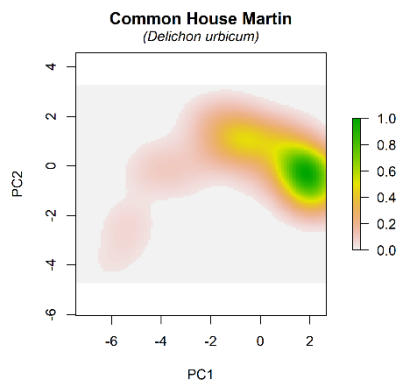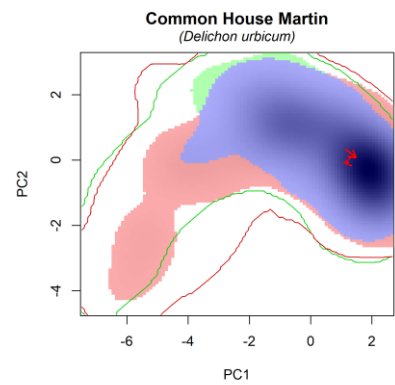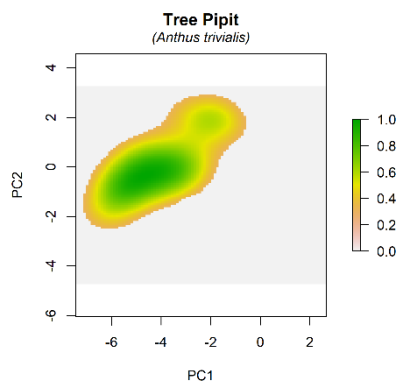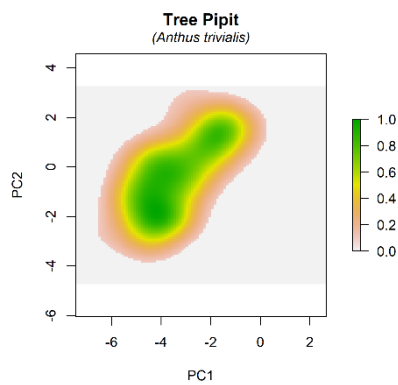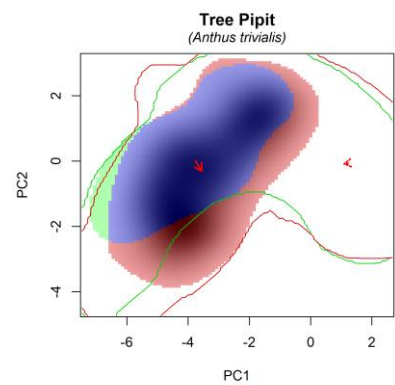



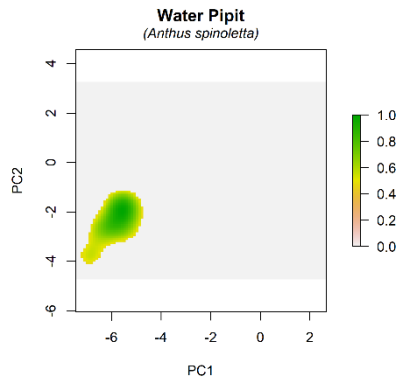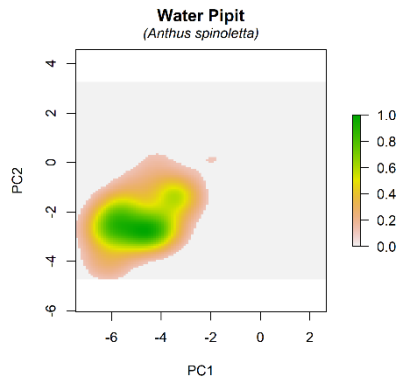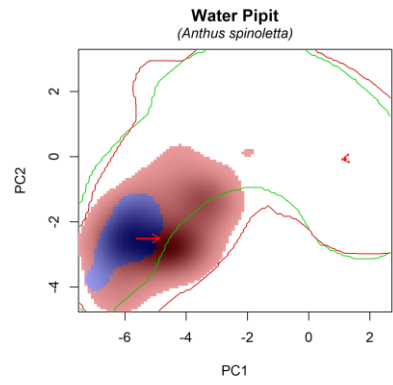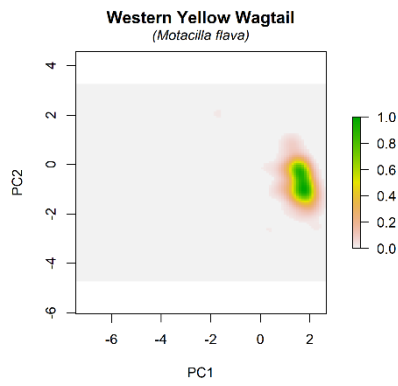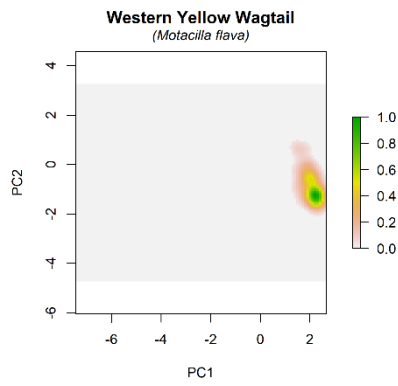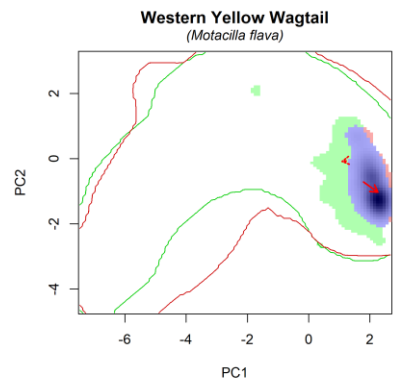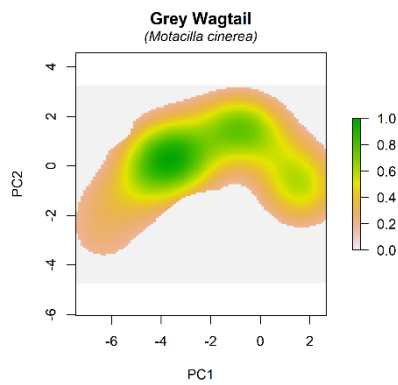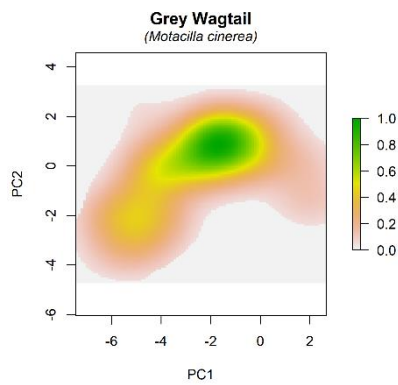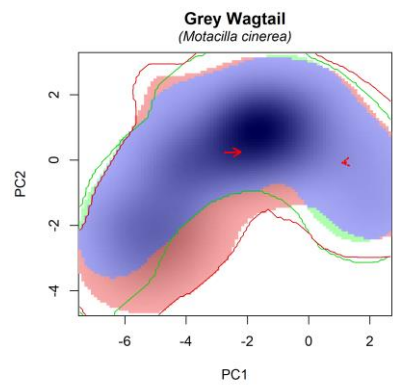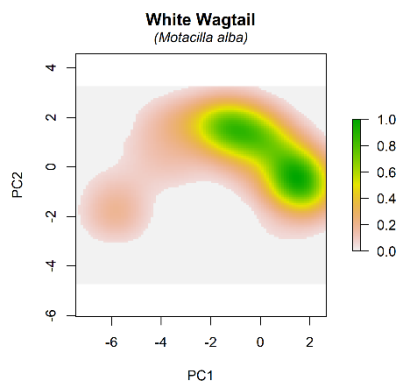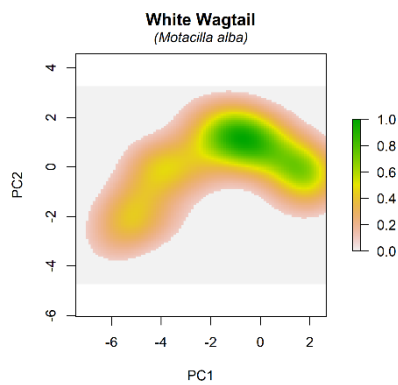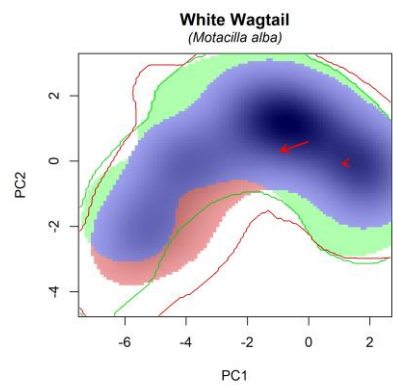

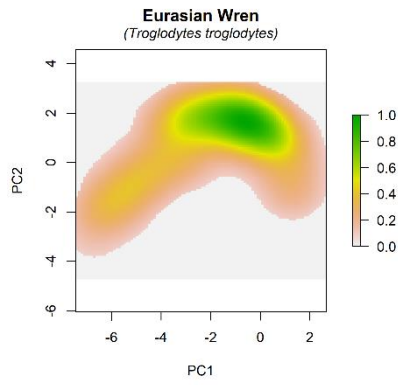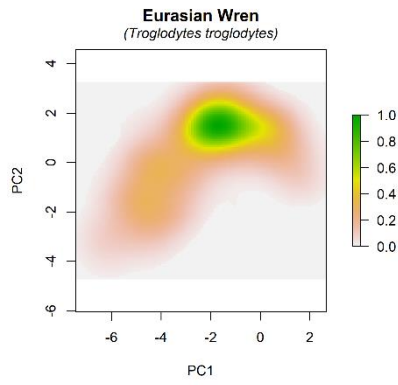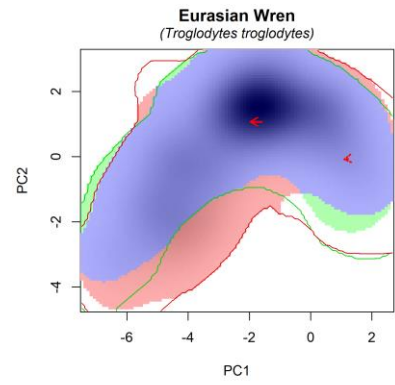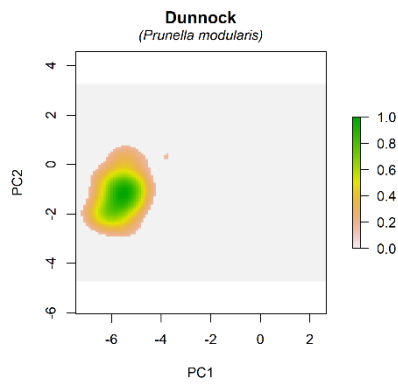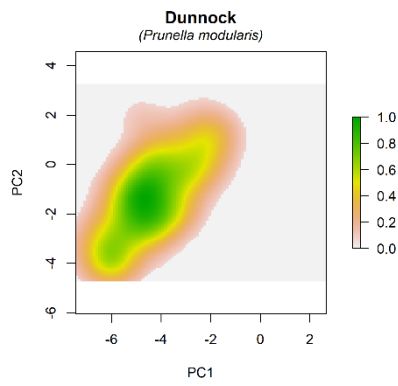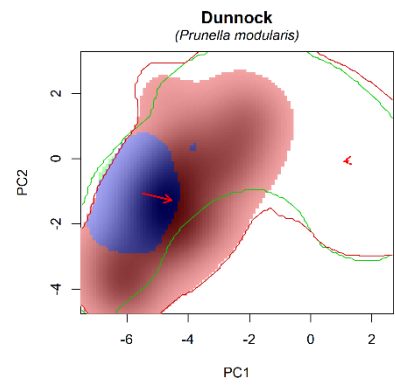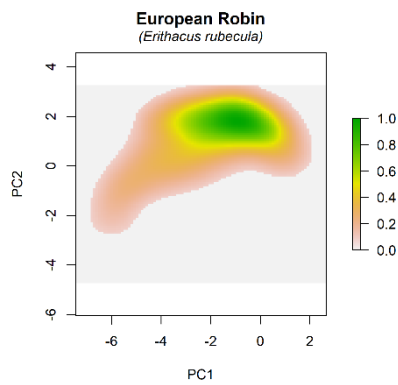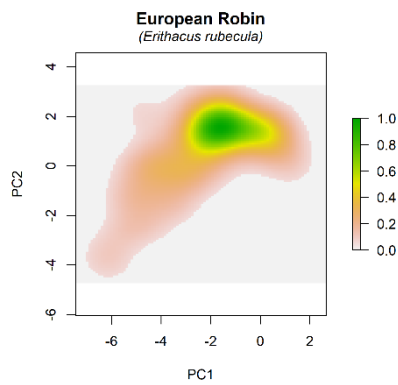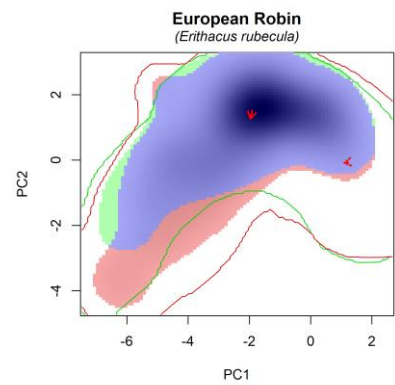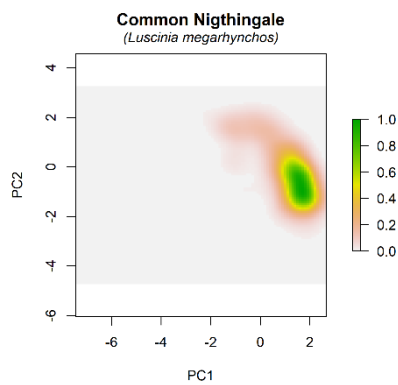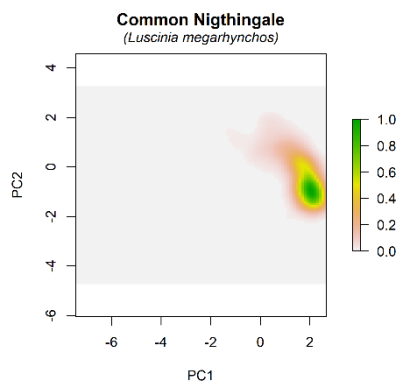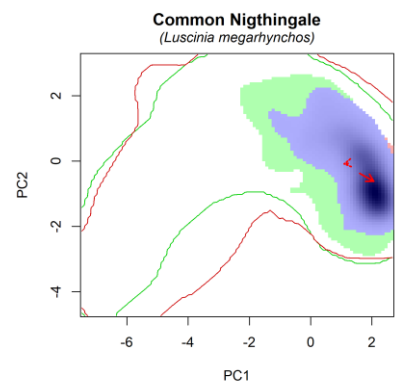

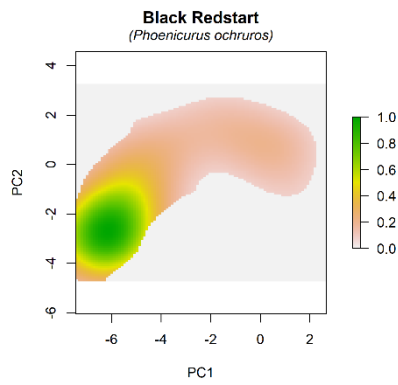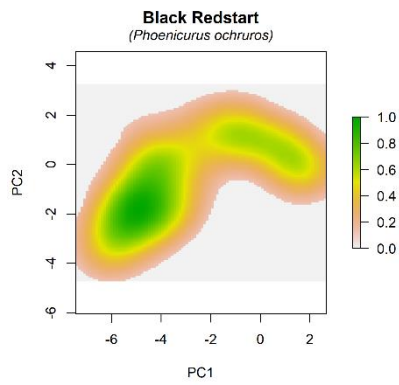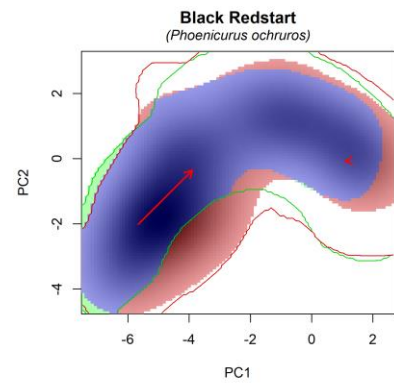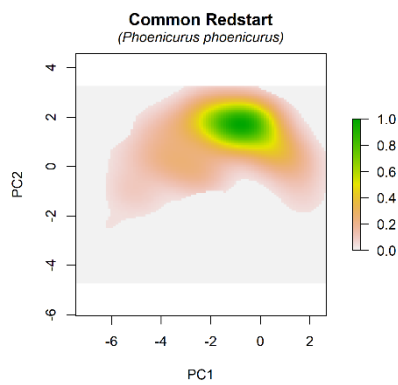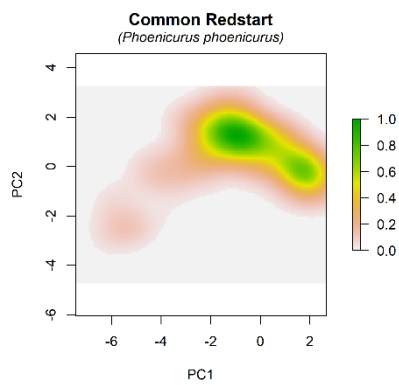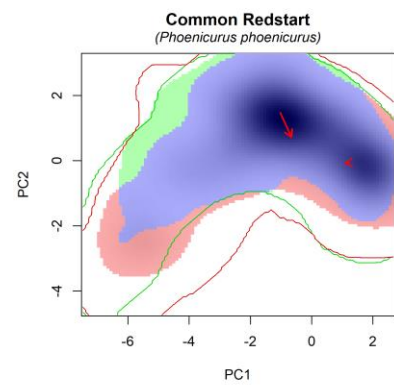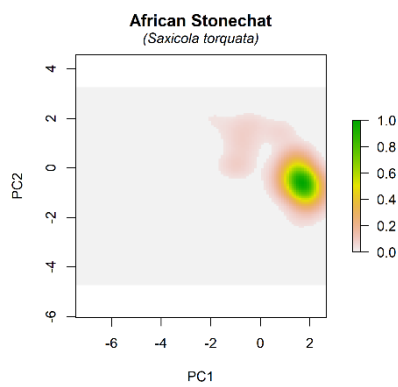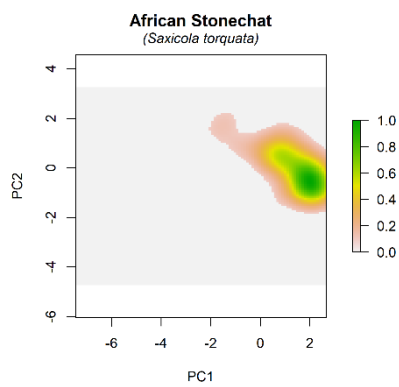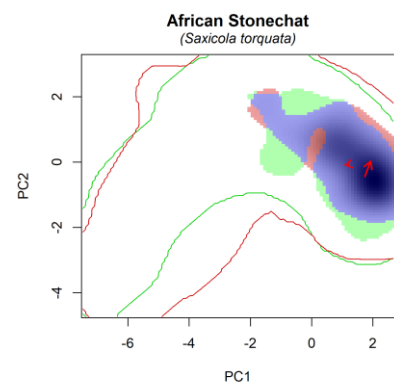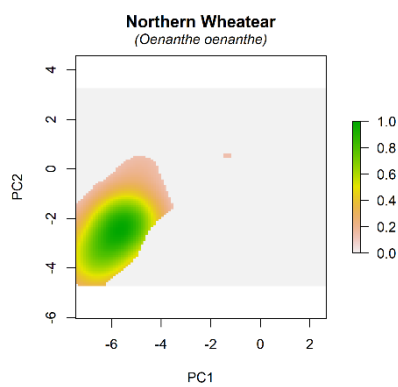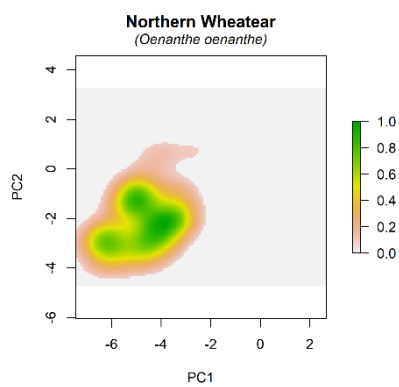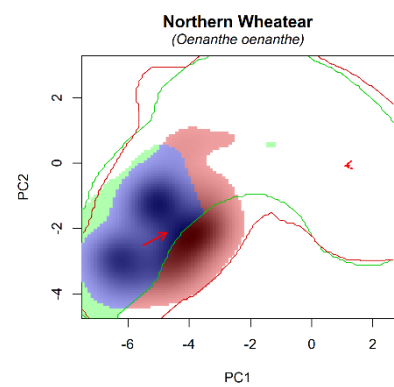

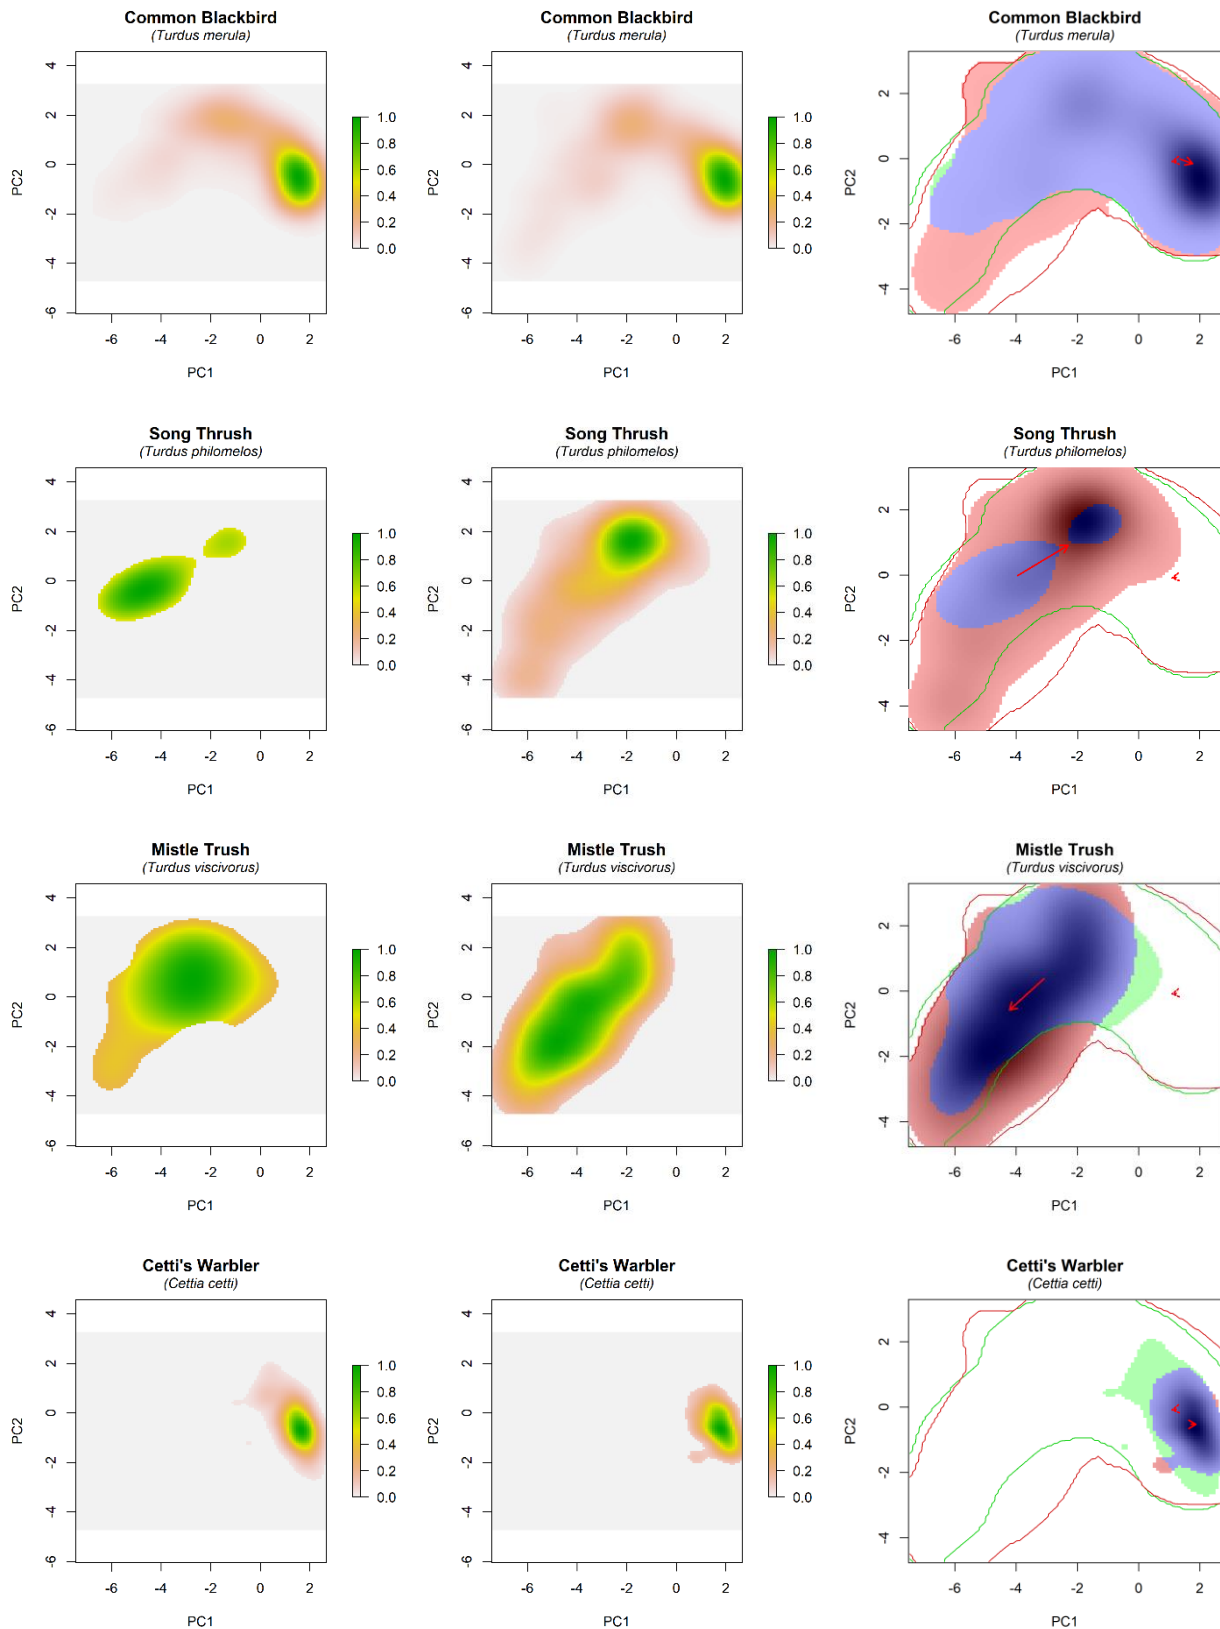

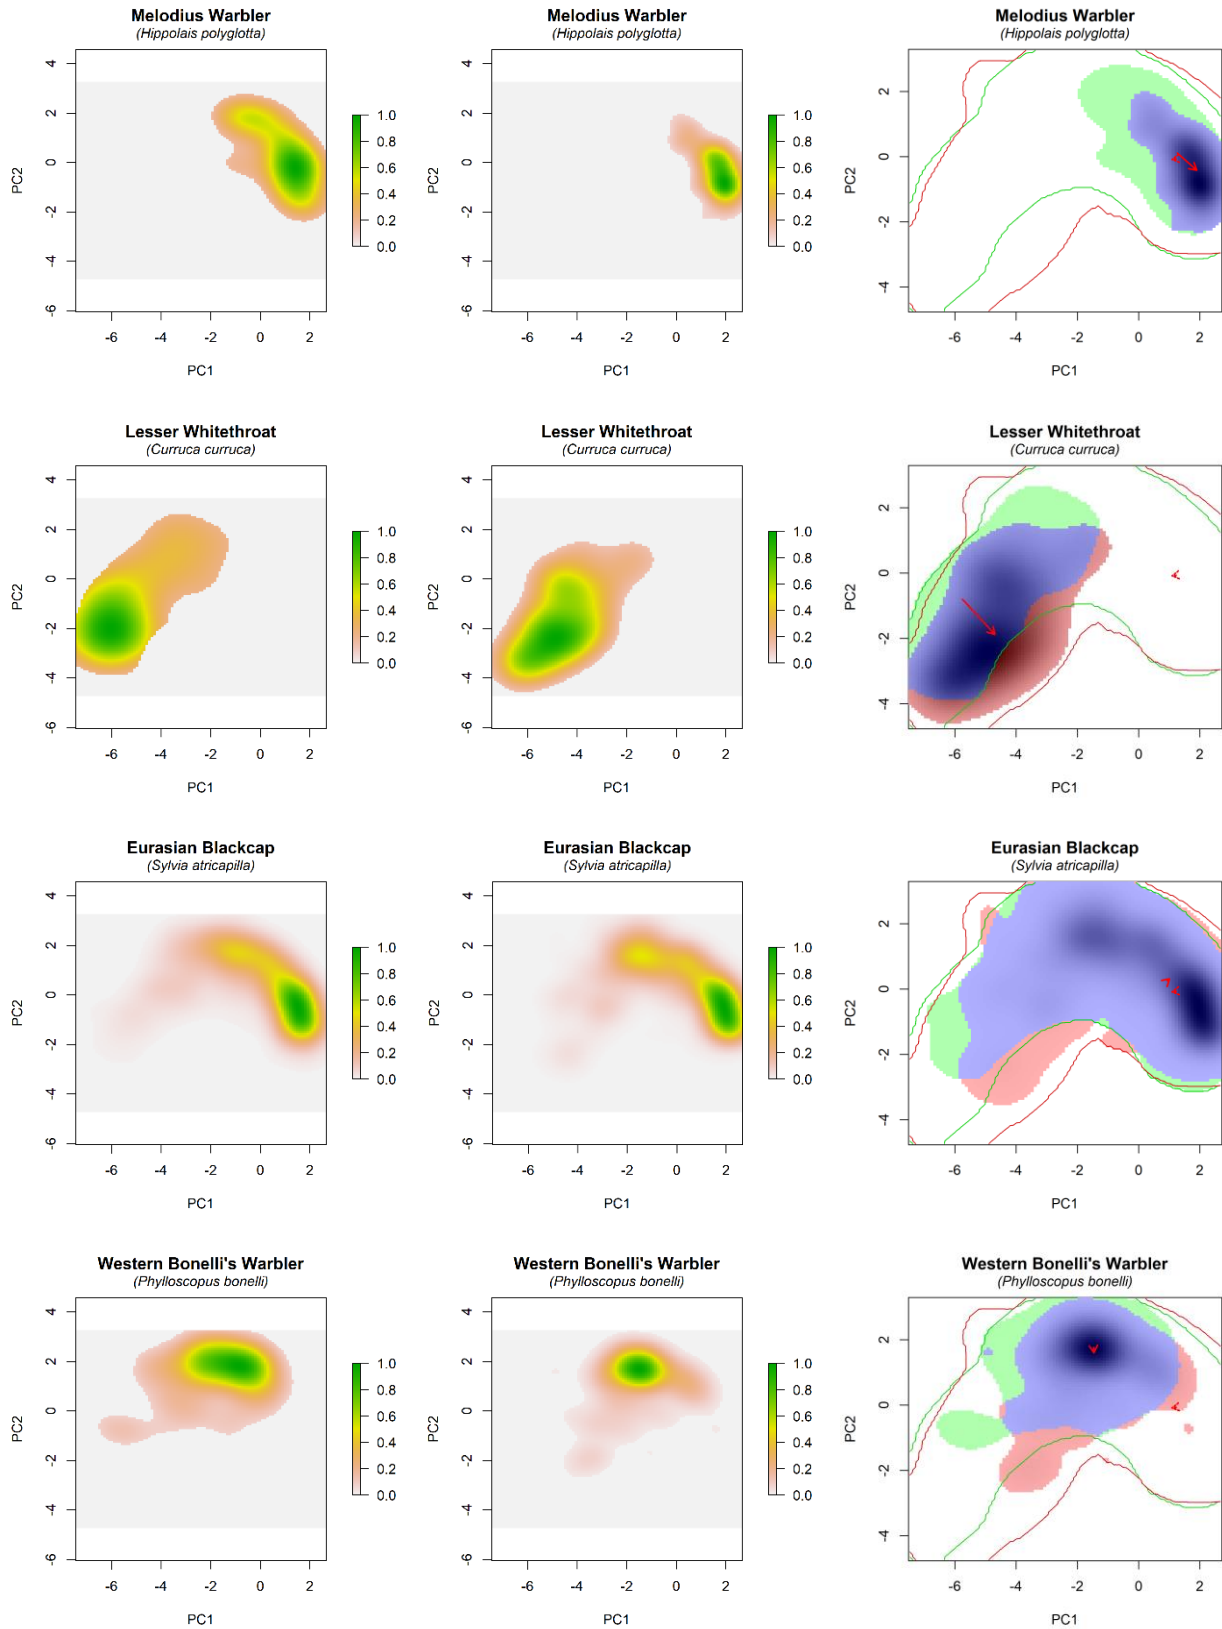

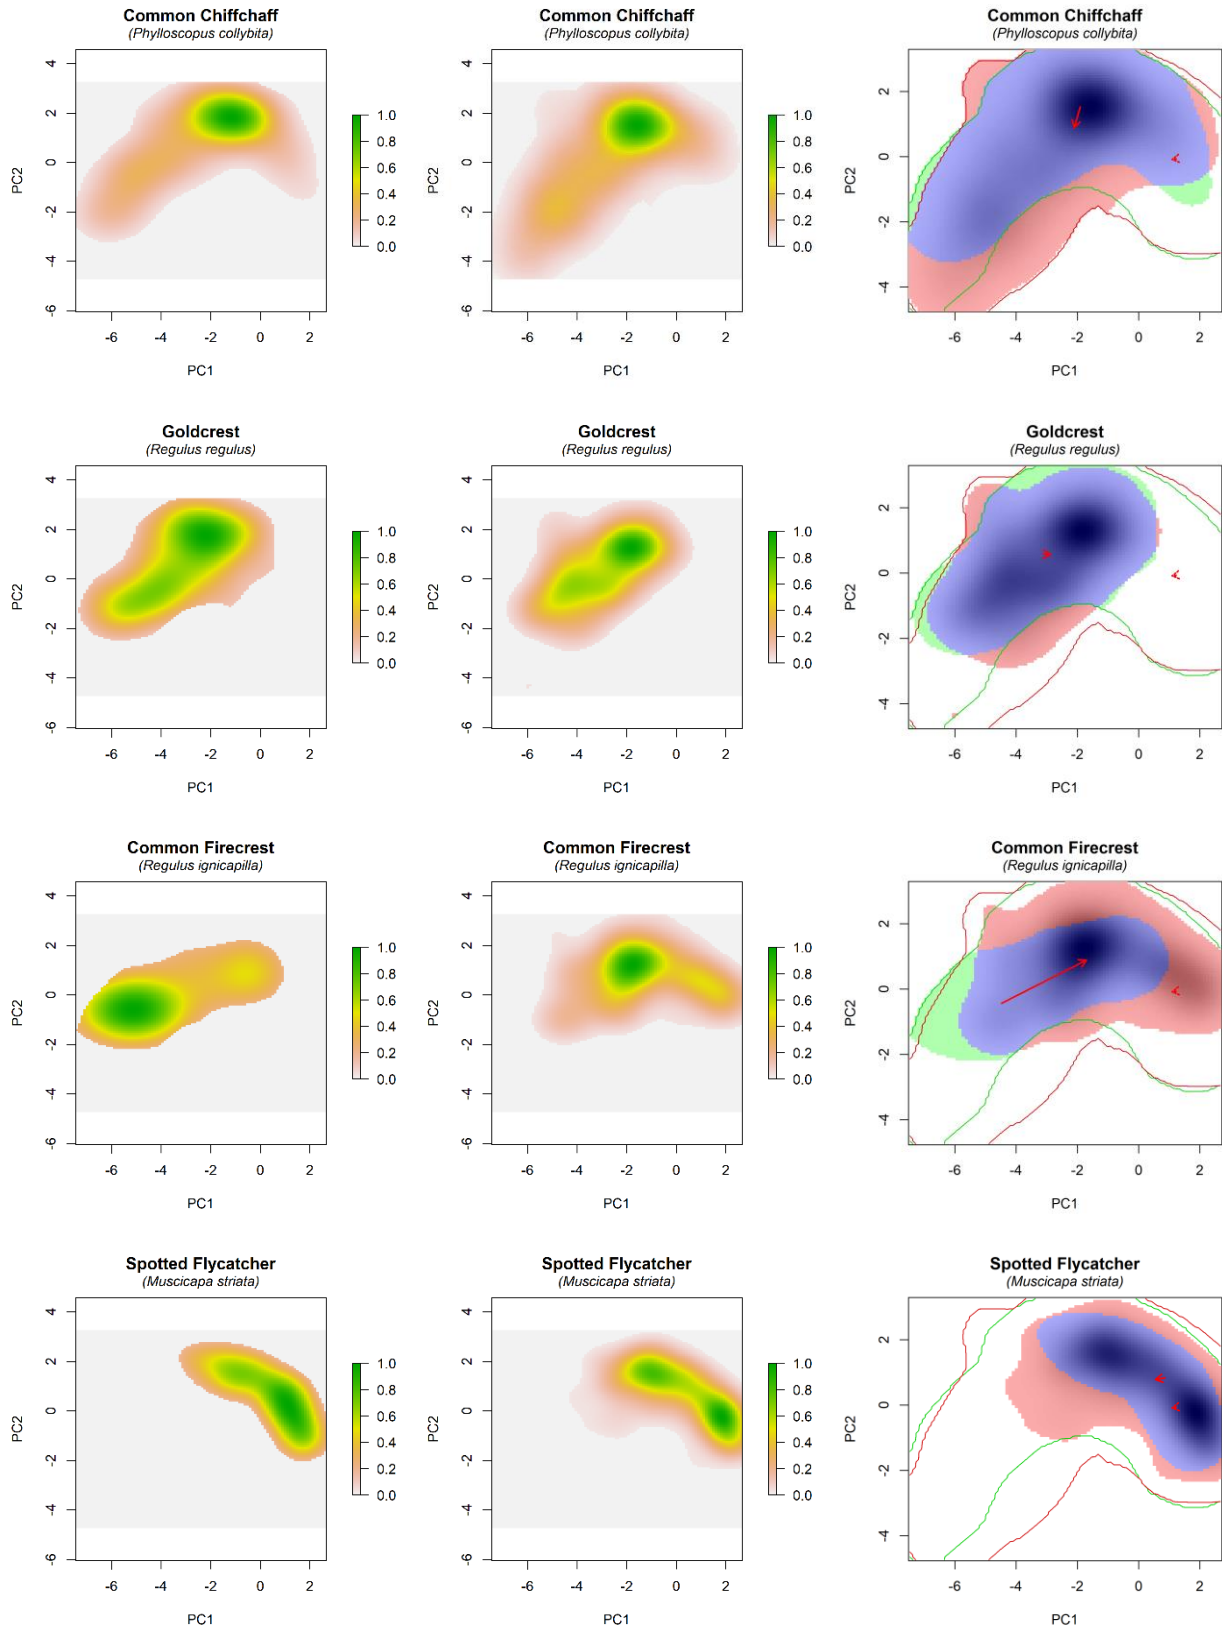

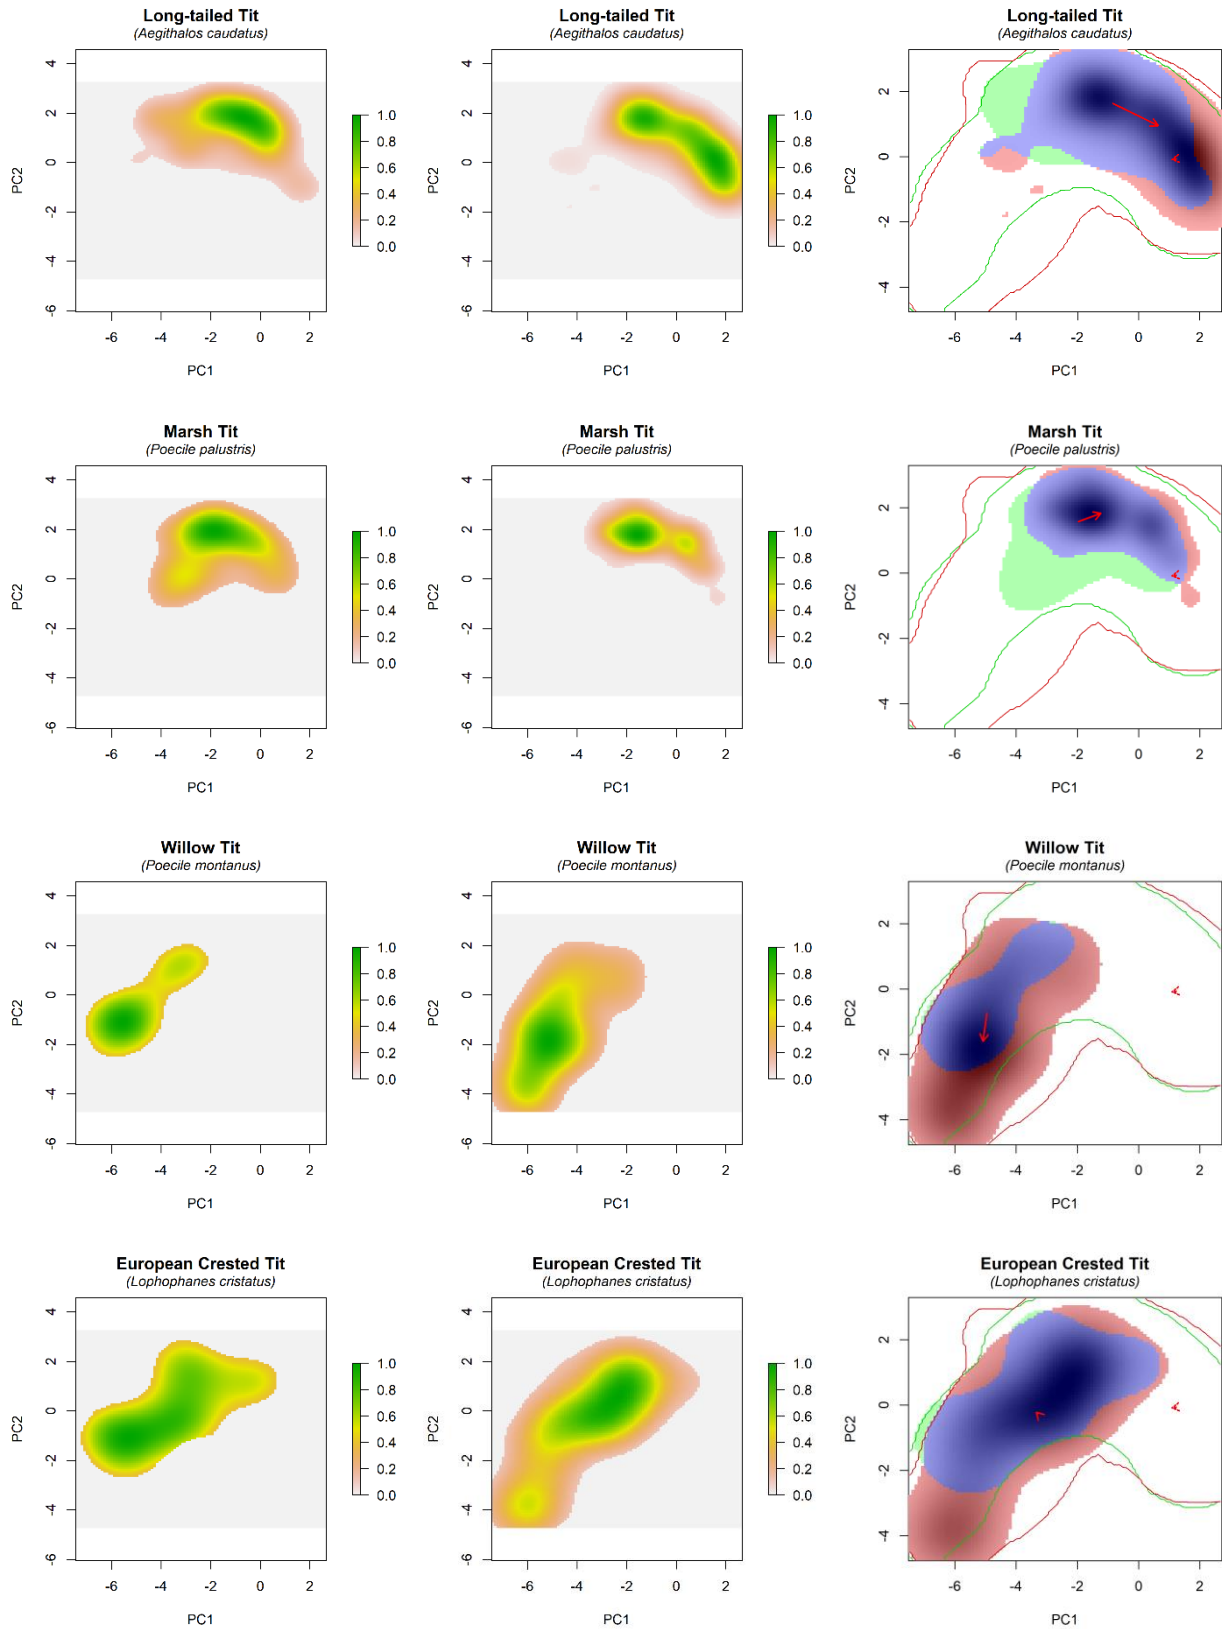



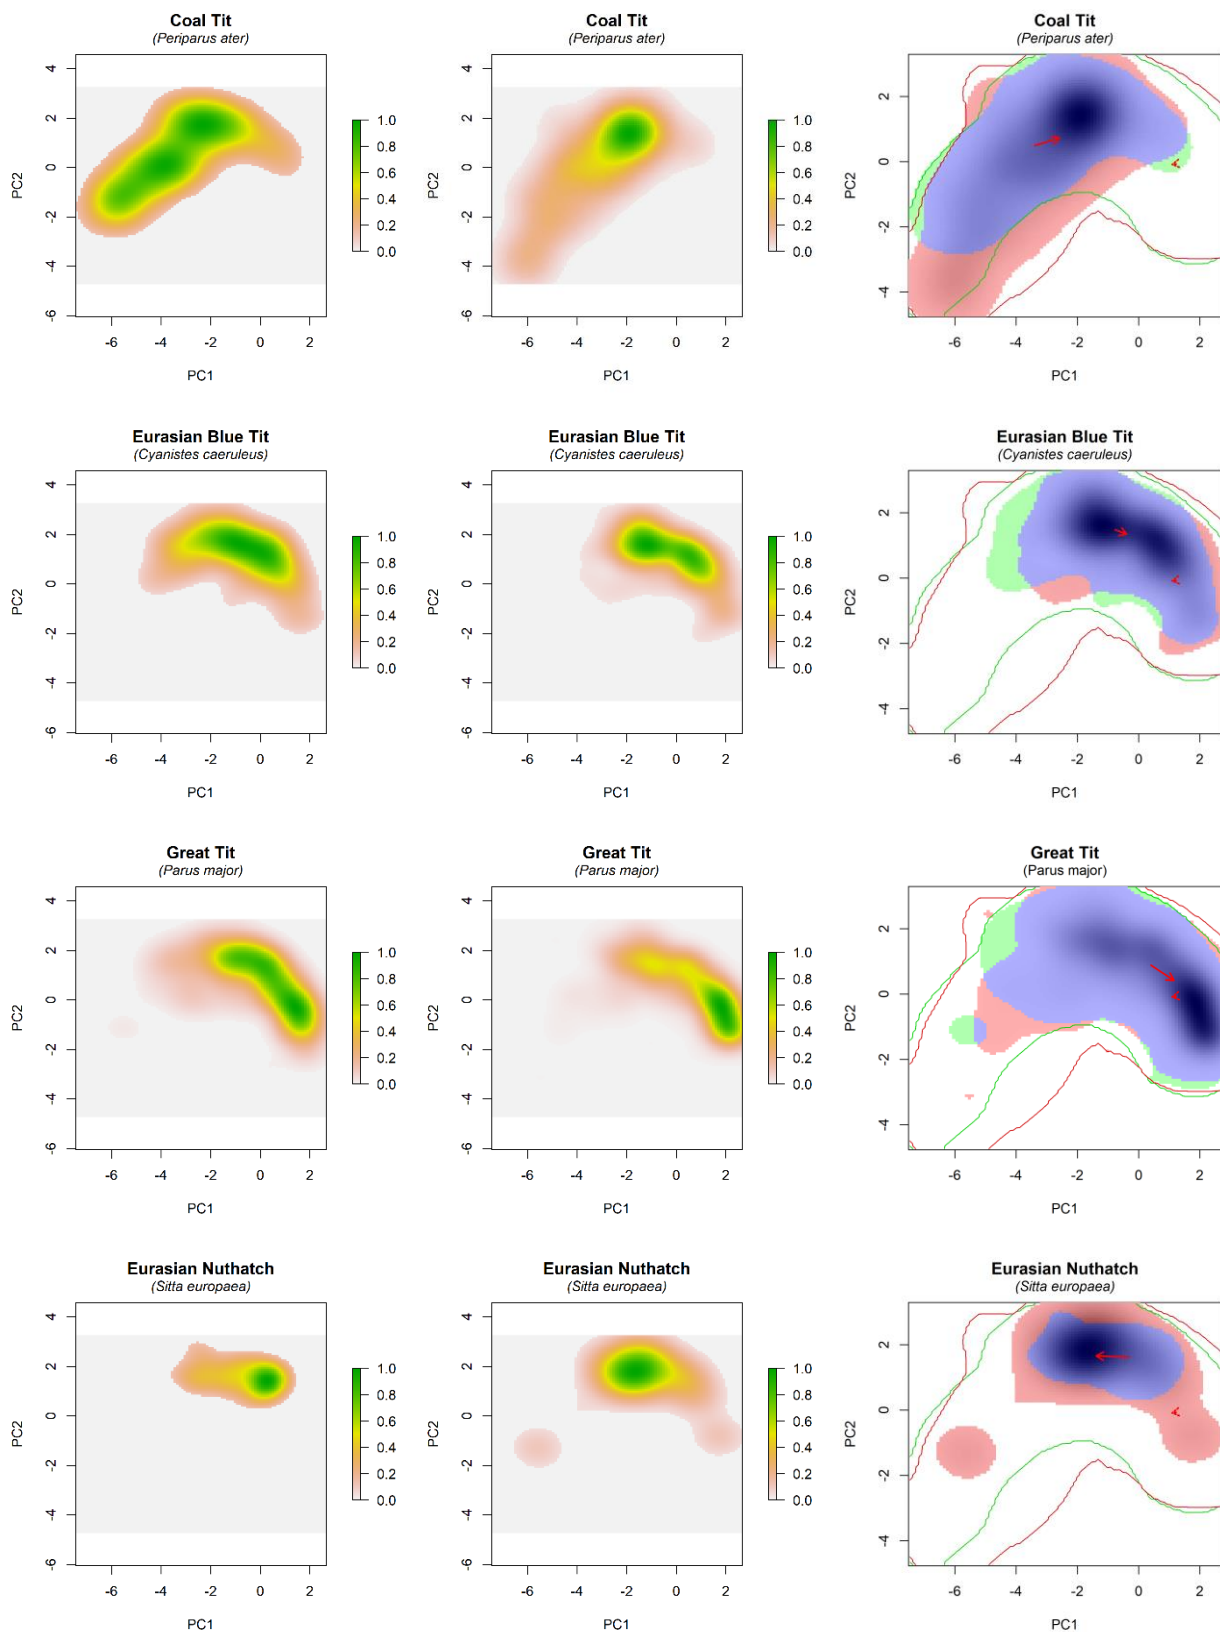



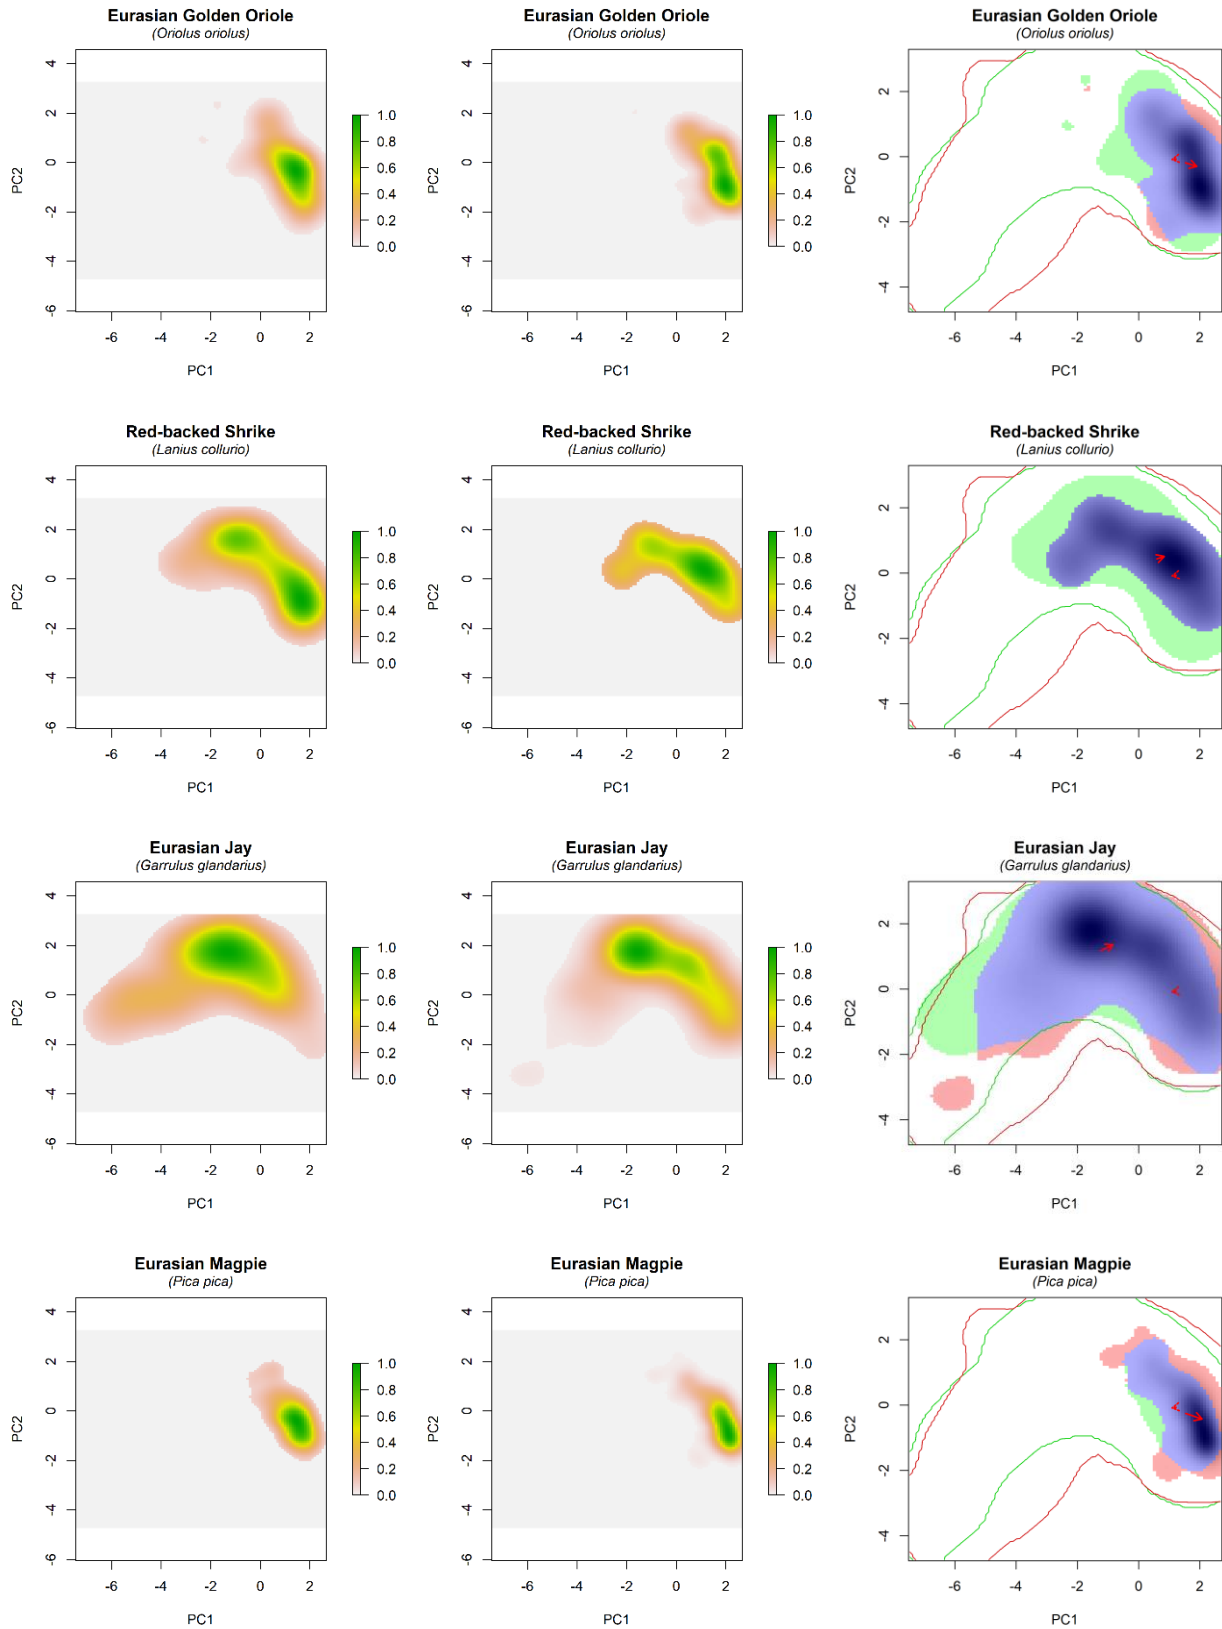

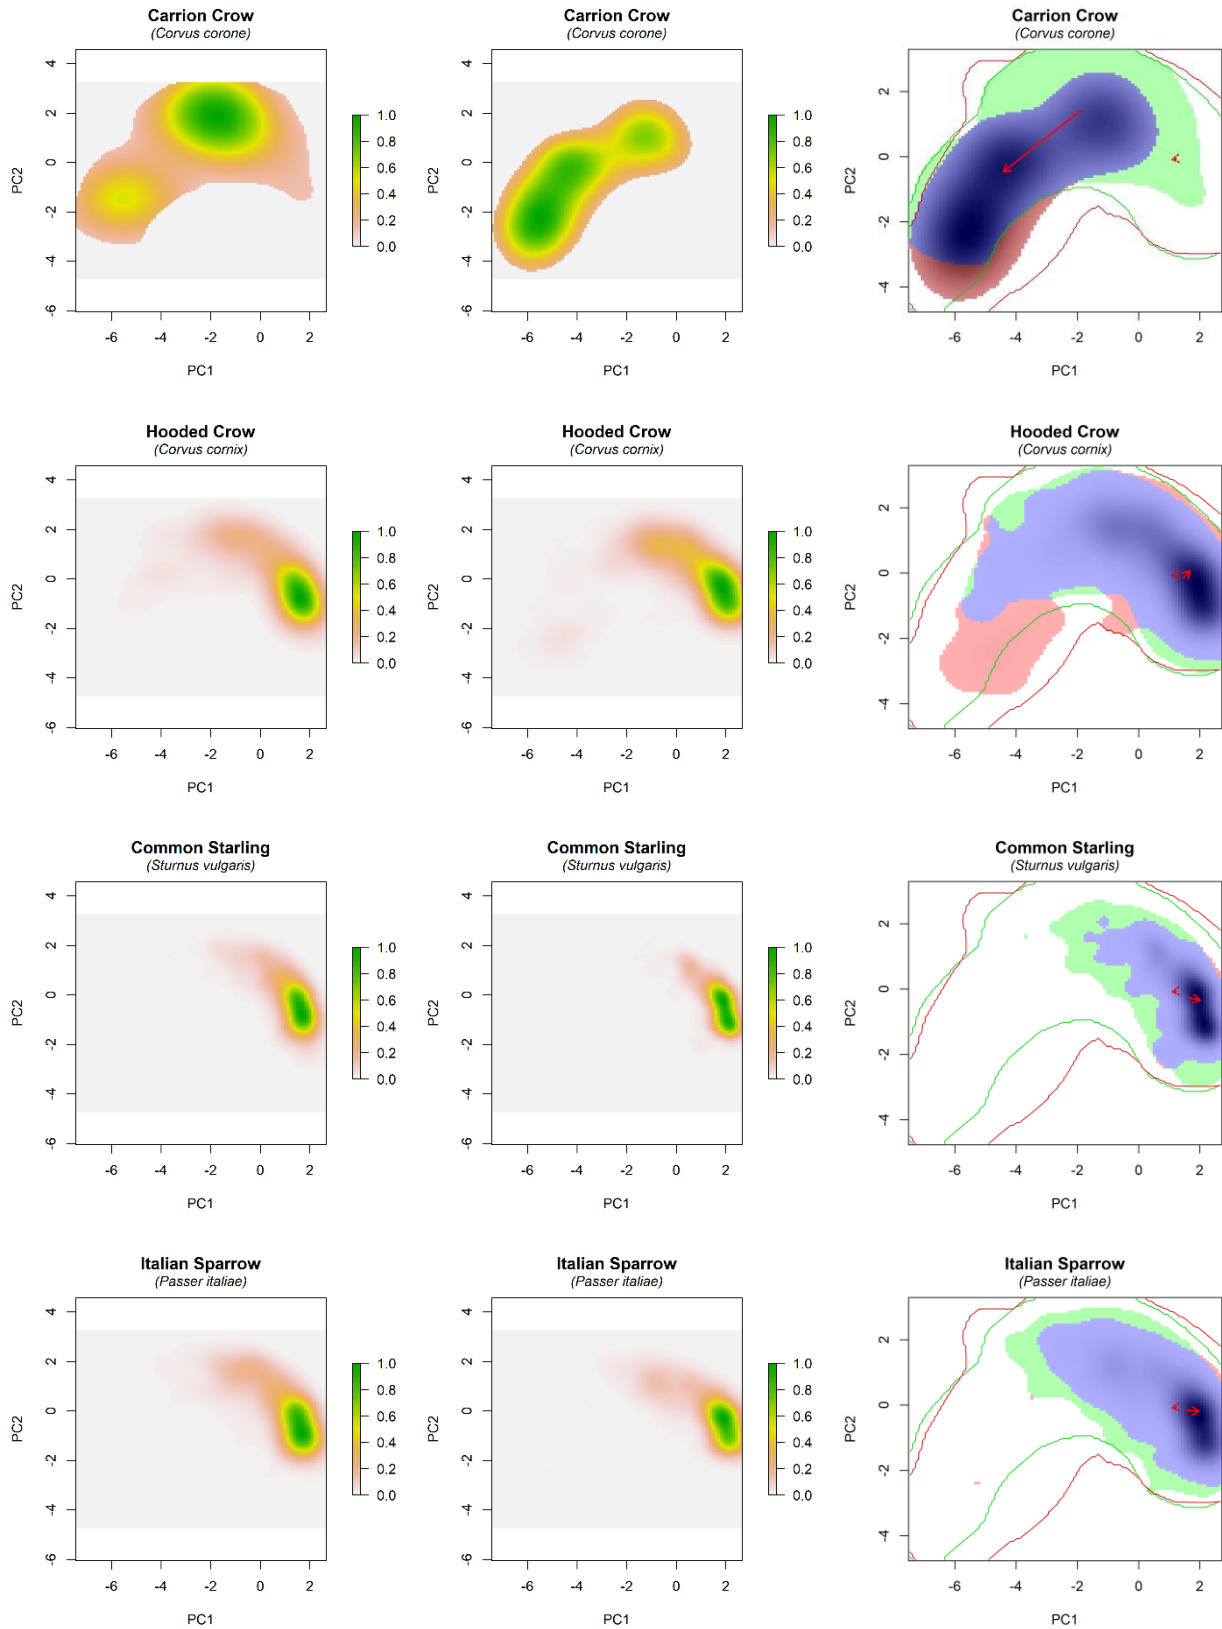

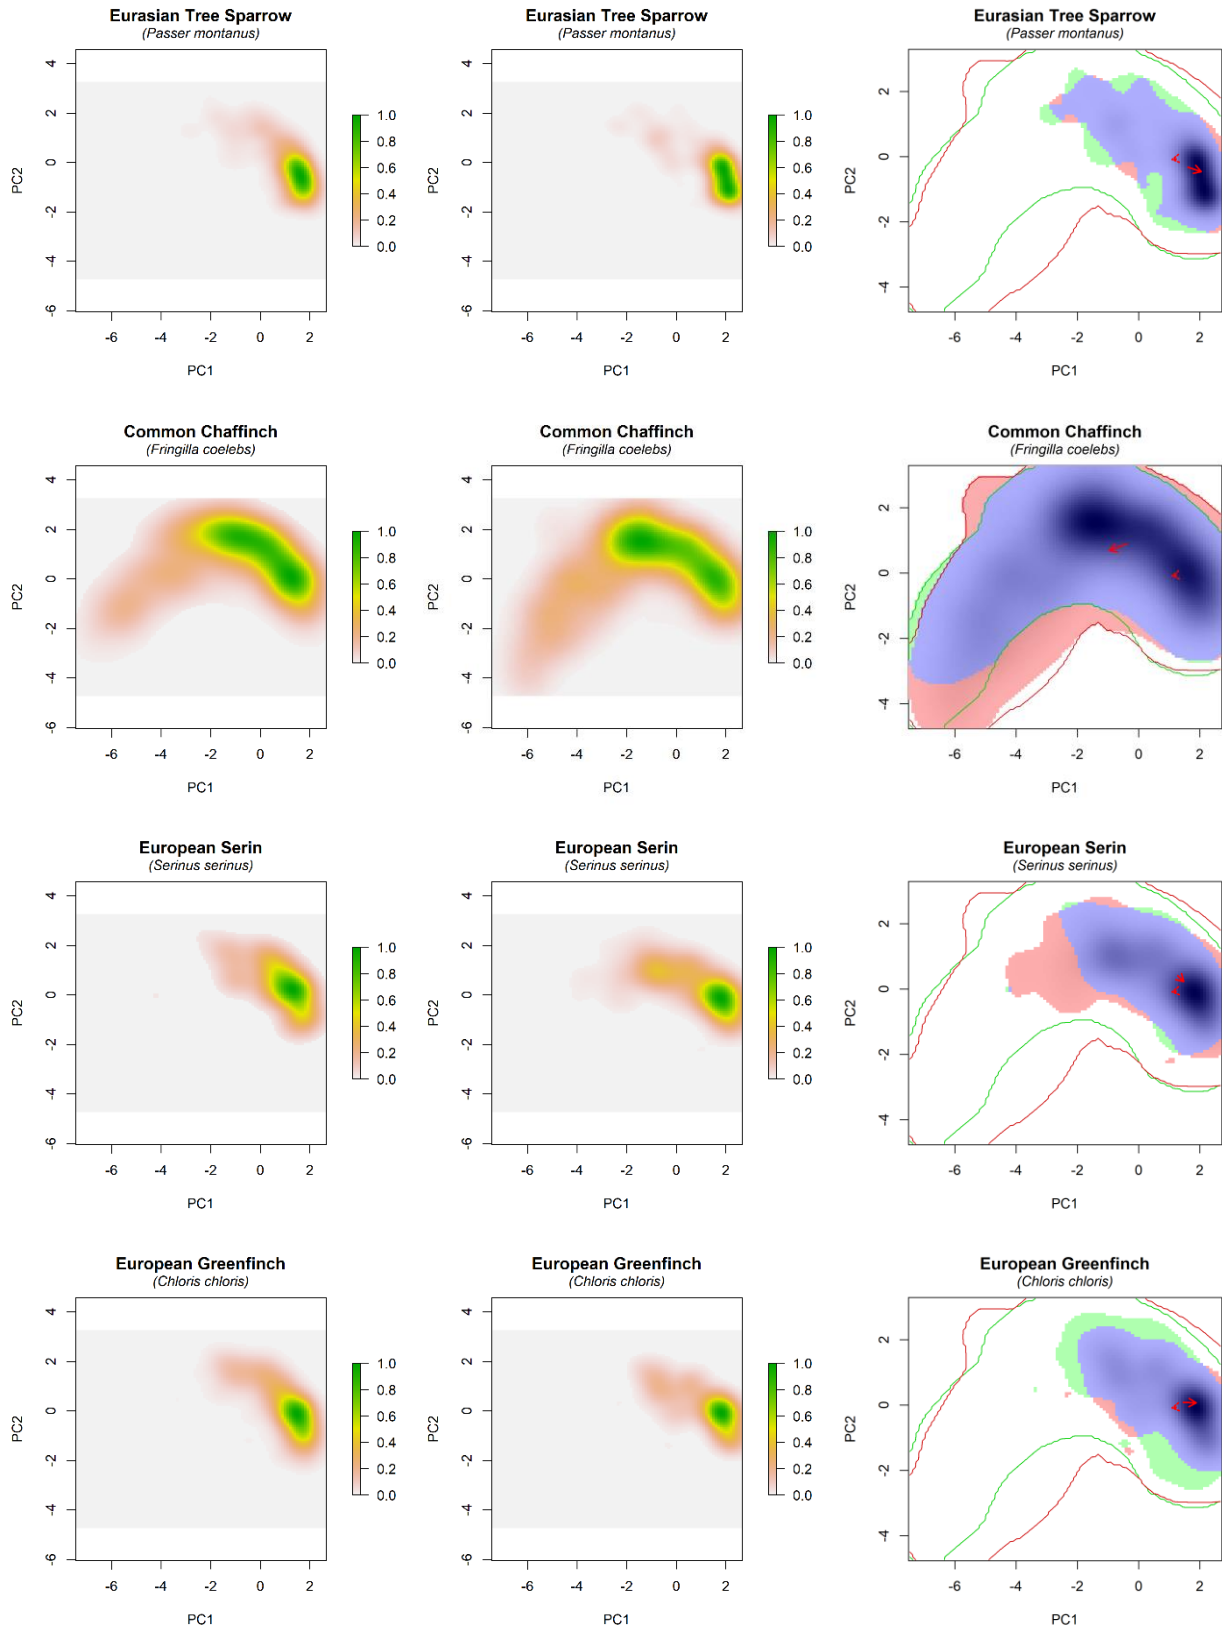

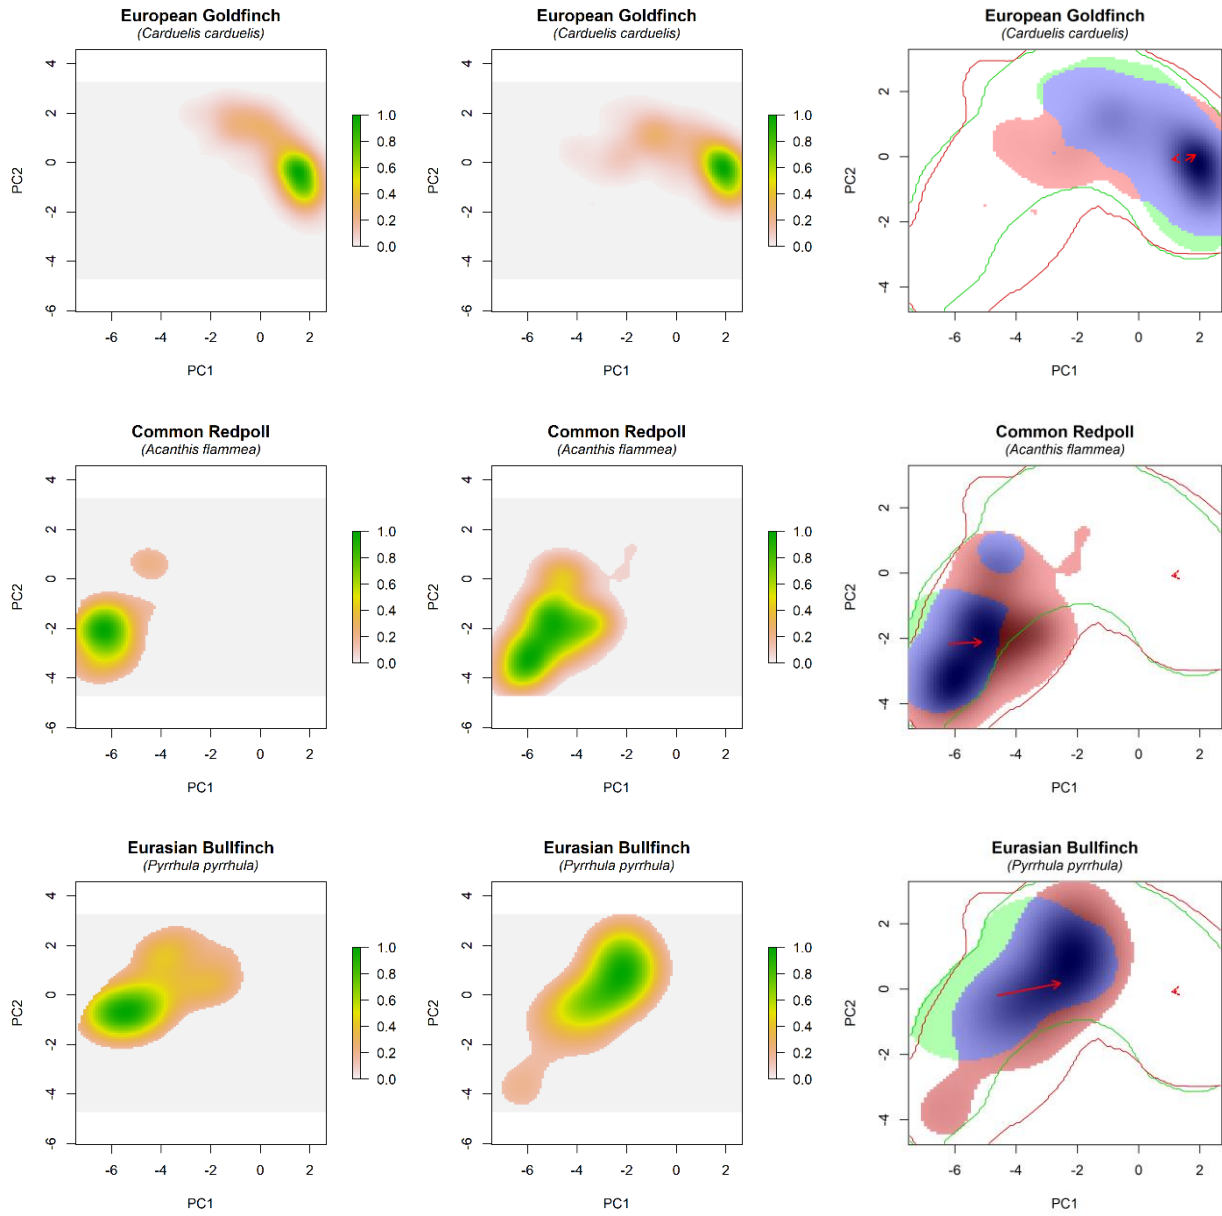

**Table S5. Schoener's D, expansion and unfilling index for each species.** Species are presented with the common name [97] and following the taxonomic order.

| <b>Species</b>            | <b>Schoener's D</b> | <b>Expansion</b> | <b>Unfilling</b> |
|---------------------------|---------------------|------------------|------------------|
| Black-crowned Night Heron | 0.52                | 0.05             | 0.22             |
| Little Egret              | 0.48                | 0.18             | 0.09             |
| Grey Heron                | 0.54                | 0.10             | 0.05             |
| Mallard                   | 0.29                | 0.01             | 0.30             |
| Black Kite                | 0.50                | 0.00             | 0.23             |
| Common Buzzard            | 0.60                | 0.12             | 0.08             |
| Common Kestrel            | 0.25                | 0.02             | 0.28             |
| Common Quail              | 0.61                | 0.00             | 0.26             |
| Common Pheasant           | 0.60                | 0.01             | 0.13             |
| Common Moohren            | 0.56                | 0.00             | 0.15             |
| Feral Pigeon              | 0.72                | 0.01             | 0.05             |
| Common Wood Pigeon        | 0.71                | 0.04             | 0.01             |
| Eurasian Collared Dove    | 0.73                | 0.01             | 0.05             |
| European Turtle Dove      | 0.62                | 0.01             | 0.12             |
| Common Cuckoo             | 0.74                | 0.00             | 0.01             |
| Common Swift              | 0.71                | 0.03             | 0.02             |
| Eurasian Wryneck          | 0.49                | 0.00             | 0.26             |
| European Green Woodpecker | 0.41                | 0.31             | 0.00             |
| Great Spotted Woodpecker  | 0.59                | 0.07             | 0.01             |
| Eurasian Skylark          | 0.14                | 0.41             | 0.00             |
| Eurasian Crag Martin      | 0.60                | 0.06             | 0.11             |
| Barn Swallow              | 0.59                | 0.00             | 0.12             |
| Common House Martin       | 0.66                | 0.08             | 0.01             |
| Tree Pipit                | 0.57                | 0.17             | 0.05             |
| Water Pipit               | 0.23                | 0.54             | 0.00             |
| Western Yellow Wagtail    | 0.49                | 0.01             | 0.22             |
| Grey Wagtail              | 0.61                | 0.03             | 0.01             |
| White Wagtail             | 0.63                | 0.05             | 0.07             |
| Eurasian Wren             | 0.71                | 0.01             | 0.01             |
| Dunnock                   | 0.27                | 0.65             | 0.00             |
| European Robin            | 0.81                | 0.06             | 0.02             |
| Common Nigthingale        | 0.61                | 0.00             | 0.12             |
| Black Redstart            | 0.54                | 0.05             | 0.01             |
| Common Redstart           | 0.63                | 0.04             | 0.04             |
| African Stonechat         | 0.58                | 0.06             | 0.08             |
| Northern Wheatear         | 0.44                | 0.09             | 0.09             |
| Common Blackbird          | 0.76                | 0.02             | 0.00             |

**Table S5** (cont.)

|                           |      |      |      |
|---------------------------|------|------|------|
| Song Thrush               | 0.21 | 0.66 | 0.00 |
| Mistle Thrush             | 0.51 | 0.10 | 0.06 |
| Cetti's Warbler           | 0.68 | 0.01 | 0.12 |
| Melodius Warbler          | 0.40 | 0.00 | 0.32 |
| Lesser Whitethroat        | 0.56 | 0.09 | 0.17 |
| Eurasian Blackcap         | 0.79 | 0.01 | 0.01 |
| Western Bonelli's Warbler | 0.47 | 0.14 | 0.15 |
| Common Chiffchaff         | 0.63 | 0.06 | 0.01 |
| Goldcrest                 | 0.71 | 0.00 | 0.04 |
| Common Firecrest          | 0.33 | 0.29 | 0.19 |
| Spotted Flycatcher        | 0.65 | 0.11 | 0.00 |
| Long-tailed Tit           | 0.59 | 0.14 | 0.08 |
| Marsh Tit                 | 0.45 | 0.04 | 0.28 |
| Willow Tit                | 0.38 | 0.47 | 0.00 |
| European Crested Tit      | 0.46 | 0.26 | 0.08 |
| Coal Tit                  | 0.61 | 0.09 | 0.06 |
| Eurasian Blue Tit         | 0.68 | 0.02 | 0.06 |
| Great Tit                 | 0.75 | 0.01 | 0.02 |
| Eurasian Nuthatch         | 0.46 | 0.25 | 0.00 |
| Eurasian Golden Oriole    | 0.57 | 0.02 | 0.08 |
| Red-backed Shrike         | 0.57 | 0.00 | 0.23 |
| Eurasian Jay              | 0.60 | 0.02 | 0.07 |
| Eurasian Magpie           | 0.61 | 0.08 | 0.05 |
| Carrion Crow              | 0.47 | 0.06 | 0.30 |
| Hooded Crow               | 0.69 | 0.02 | 0.01 |
| Common Starling           | 0.63 | 0.00 | 0.06 |
| Italian Sparrow           | 0.70 | 0.00 | 0.03 |
| Eurasian Tree Sparrow     | 0.67 | 0.01 | 0.03 |
| Common Chaffinch          | 0.70 | 0.02 | 0.00 |
| European Serin            | 0.73 | 0.05 | 0.01 |
| European Greenfinch       | 0.65 | 0.01 | 0.08 |
| European Goldfinch        | 0.60 | 0.06 | 0.02 |
| Common Redpoll            | 0.48 | 0.27 | 0.03 |
| Eurasian Bullfinch        | 0.40 | 0.21 | 0.23 |

**Table S6. Coordinates of the 18 continuous species traits and of niche metrics respect to the four retained PCA-axes (trait space).** See Table S2 for traits' abbreviations.

| <b>Traits</b>        | <b>Dim1</b> | <b>Dim2</b> | <b>Dim3</b> | <b>Dim4</b> |
|----------------------|-------------|-------------|-------------|-------------|
| len                  | 0.97        | 0.06        | 0.13        | 0.10        |
| wing                 | 0.97        | 0.09        | −0.08       | −0.04       |
| tail                 | 0.76        | 0.03        | 0.05        | 0.04        |
| bil                  | 0.81        | −0.10       | 0.16        | 0.05        |
| tar                  | 0.90        | −0.01       | 0.17        | 0.10        |
| wei                  | 0.92        | 0.08        | 0.25        | 0.12        |
| clu                  | −0.19       | −0.15       | 0.89        | −0.11       |
| bro                  | −0.27       | 0.43        | −0.29       | 0.71        |
| fec                  | −0.49       | 0.19        | 0.58        | 0.43        |
| inc                  | 0.83        | 0.17        | 0.20        | −0.11       |
| fle                  | 0.75        | 0.24        | 0.11        | −0.11       |
| disr                 | 0.42        | 0.24        | −0.44       | −0.55       |
| SSI.fh               | −0.25       | 0.75        | 0.34        | −0.12       |
| SSI.acq              | 0.14        | 0.58        | −0.32       | 0.27        |
| SSI.nes              | −0.16       | 0.85        | 0.13        | −0.25       |
| SSI.fs               | 0.24        | 0.77        | −0.09       | 0.11        |
| SSI.tr               | −0.70       | 0.08        | 0.11        | −0.39       |
| SSI.ov               | −0.29       | 0.92        | 0.08        | −0.16       |
| <b>Niche metrics</b> | <b>Dim1</b> | <b>Dim2</b> | <b>Dim3</b> | <b>Dim4</b> |
| Schoener's D         | −0.08       | 0.10        | −0.12       | 0.07        |
| Expansion            | −0.13       | −0.06       | −0.04       | 0.10        |
| Unfilling            | 0.23        | −0.04       | 0.19        | −0.17       |

**Figure S4. Biplots between niche metrics and PCA-axes (trait space). (a) Dim1-Dim4. (b) Dim3-Dim4.** For traits' abbreviations see Table S2. Dashed red arrows indicate the intensity of correlation for the niche metrics in the PCA space. D = Schoener's D; exp = expansion index; unf = unfilling index.

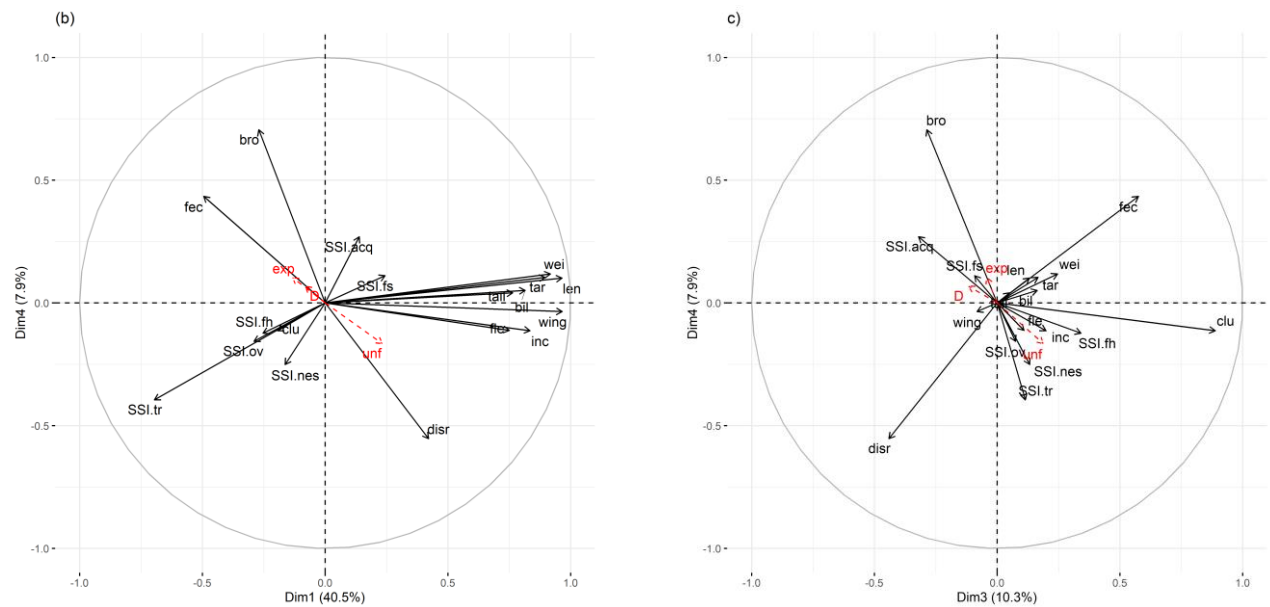

Supplement: s1 [file s1]
